1 **Novel method for clarifying faster interstitial flow in the intimal side of the aorta under**  
2 **intraluminal pressurization**

3

4 **Authors:**

5 Wataru Fukui, † Ujihara Yoshihiro, † Masanori Nakamura, †‡§ and Shukei Sugita †‡\*

6

7 **Affiliations:**

8 † Department of Electrical and Mechanical Engineering, Nagoya Institute of Technology,  
9 Gokiso-cho, Showa-ku, Nagoya, Japan.

10 ‡ Center of Biomedical Physics and Information Technology, Nagoya Institute of  
11 Technology, Gokiso-cho, Showa-ku, Nagoya, Japan.

12 § Department of Nanopharmaceutical Sciences, Nagoya Institute of Technology, Gokiso-  
13 cho, Showa-ku, Nagoya, Japan.

14

15 \*Correspondence: [sugita.shukei@nitech.ac.jp]

16

17 **Abstract (150-200 words)**

18 Hypertension causes aortic thickening, especially on the intimal side. Although the production  
19 of the extracellular matrix is observed, the type of mechanical stress that produces this response  
20 remains unclear. In this study, we hypothesize that the interstitial flow causes the thickening.  
21 To validate this claim, we proposed a novel method to measure the velocity distribution in the  
22 radial direction in the aorta, which has been unclear. A fluorescent dye was introduced in the  
23 lumen of the mouse thoracic aorta *ex vivo*, intraluminal pressure was applied, and a time-lapse  
24 image in the radial-circumferential plane was acquired under a two-photon microscope. The  
25 flow of the fluorescent dye from the intimal to the adventitial sides in the aorta was successfully  
26 observed. The acquired image was converted to a radial-time image (i.e., kymograph), and the  
27 flow velocity was quantified by applying the one-dimensional advection-diffusion equation to  
28 the fluorescent images. The results revealed a higher interstitial flow velocity in the aortic walls  
29 under higher intraluminal pressure and a higher velocity on the more intimal side. Thus, the  
30 interstitial flow is a candidate for the mechanical stress causing hyperplasia of the aorta under  
31 hypertension.

## 1 Introduction

2 Hypertension causes aortic thickening (Bevan, 1976), especially on the intimal side  
3 (Matsumoto & Hayashi, 1996). During aortic thickening, an increase in ground substances was  
4 observed (Matsumoto & Hayashi, 1996). Aortic thickening is caused by the response of the  
5 aorta to maintain the circumferential normal stress in the physiological state even under higher  
6 intraluminal pressures (Matsumoto & Hayashi, 1996). If the aortic walls are assumed to be  
7 incompressible, the intimal side is more stretched in the circumferential direction than the  
8 adventitial side under higher intraluminal pressure. Thus, the aortic response is considered to  
9 be triggered by this stretching. Specifically, smooth muscle cells (SMCs) are cyclically  
10 stretched in the circumferential direction with changes in the intraluminal pressure, and they  
11 are believed to sense the force and respond accordingly. Several *in vitro* studies have reported  
12 the upregulation of collagen synthesis: SMCs subjected to 20% strain produce more L-proline,  
13 which is essential for the synthesis of collagen, than those subjected to 10% strain (Reyna et  
14 al., 2004); stretched SMCs increase the expression of collagen  $\alpha 1$  (Stanley et al., 2000); and  
15 SMCs under 18% strain show increased production of prolyl-4-hydroxylase subunit  $\alpha$ -1, a  
16 catalyst for the hydroxylation of L-proline and collagen types I and III (Liu et al., 2015).

17 The interstitial flow in the aortic walls also increases under hypertension. The  
18 hydraulic conductance, calculated as the transmural interstitial flow velocity divided by the  
19 intraluminal pressure, was almost constant for intraluminal pressures of 75–150 mmHg  
20 (Baldwin & Wilson, 1993), indicating that a higher intraluminal pressure results in a faster  
21 interstitial flow in the aortic walls. When hydrostatic pressure is applied on the intraluminal  
22 surface of the aorta, liquid in the lumen enters the aortic walls (Vargas et al., 1979) and moves  
23 toward the adventitial side. Thus, SMCs in the aortic walls are subjected to fluid flow stress.  
24 Computer simulations have already indicated that SMCs are subjected to increased shear stress  
25 with increasing intraluminal pressure (Dabagh et al., 2008; Tada & Tarbell, 2002). *In vitro*  
26 studies have reported that SMCs respond to shear stress. For example, SMCs incubated on a  
27 culture dish and subjected to shear stress increase the production rate of nitric oxide (NO) and  
28 endothelial nitric oxide synthase (eNOS) (Kim et al., 2017), prostaglandin I<sub>2</sub> and E<sub>2</sub> (PGI<sub>2</sub> and  
29 PGE<sub>2</sub>, respectively) (Wang & Tarbell, 2000), and platelet-derived growth factor (PDGF) and

30 basic fibroblast growth factor (bFGF) (Sterpetti et al., 1994). SMCs embedded in collagen gels  
31 and subjected to shear stress also produce PGI<sub>2</sub> and PGE<sub>2</sub> (Wang & Tarbell, 2000). Interestingly,  
32 SMCs subjected to shear stress reduce the expression of contractile marker proteins such as  
33 smooth muscle myosin heavy chain, smoothelin, and calponin, indicating that an interstitial  
34 flow changes SMCs from a more contractile to a more synthetic state (Shi et al., 2010). Changes  
35 from the contractile to the synthetic phenotype of SMCs are associated with the increased  
36 synthesis of collagen and elastin (Sjölund et al., 1986). Therefore, the high shear stress due to  
37 the interstitial flow under hypertension might cause aortic thickening.

38           Previous studies measured the average interstitial flow in the aorta by measuring the  
39 liquid volume leaking out from the outer surface of the aorta and dividing it by the outer surface  
40 area (Baldwin & Wilson, 1993; Baldwin et al., 1997; Baldwin et al., 1992; Chooi et al., 2016;  
41 Deng et al., 1998; Gaballa et al., 1992; Lever et al., 1992; Lu et al., 2013; Nguyen et al., 2015;  
42 Shou et al., 2006; Tarbell et al., 1988; Wang et al., 2019). However, the interstitial flow velocity  
43 may differ at different locations in the aortic walls because these walls are heterogeneous. For  
44 example, collagen fibers are abundant on the dorsal and proximal sides relative to the ventral  
45 and distal sides (Concannon et al., 2020; Sugita & Matsumoto, 2013), and space in the dorsal  
46 side is smaller than that in the ventral side (Tedgui & Lever, 1987). Furthermore, smooth  
47 muscle-rich layers (SMLs) and elastic laminae (ELs), whose constituents are completely  
48 different, alternate in the radial direction.

49           If the interstitial flow influences aortic thickening, it must be higher in the intimal  
50 side. However, to the best of our knowledge, no method has been developed for measuring the  
51 local interstitial flow. Therefore, in this study, we proposed a novel method for quantifying the  
52 local interstitial flow velocity in the aorta. Then, we applied this method to measure the flow  
53 velocity distribution in the radial direction of the aorta.

54

## 55 **Materials & Methods**

### 56 **Sample preparation**

57           Five Slc:ddY mice (8–11 weeks, 30–42 g, Chubu Kagaku Shizai, Nagoya, Japan)  
58 were used as a test model. All animal experiments were approved by the Institutional Review

59 Board of Animal Care at Nagoya Institute of Technology. The thoracic aorta was excised as  
60 reported in previous studies (Sugita et al., 2020; Sugita & Matsumoto, 2017). After the mouse  
61 was euthanized in a CO<sub>2</sub> chamber, its thoracic aorta was exposed. As a length marker in the  
62 longitudinal direction *in vivo*, gentian violet dots were marked at 3-mm intervals on the surface  
63 of the aorta. After intercostal arteries were cauterized, the aorta was resected. The tubular  
64 sample was immersed in a buffer (0.5 mM CaCl<sub>2</sub>, 23.1 mM NaCl, 0.9 mM KCl, 0.2 mM  
65 MgSO<sub>4</sub>, 4.4 mM NaHCO<sub>3</sub>, 0.2 mM KH<sub>2</sub>PO<sub>4</sub>, 1.8 mM glucose) until the next experiment to  
66 maintain the activity of the SMCs in the aorta.

67

### 68 **Intraluminal pressurization**

69 The obtained tubular sample was pressurized in a manner similar to that in previous  
70 studies (Sugita et al., 2020; Sugita & Matsumoto, 2017). Figure 1 shows a schematic of the  
71 experimental setup. The air pressure was regulated using an electropneumatic regulator  
72 (640BA20B, Asahi Enterprise, Tokyo, Japan) connected to a pressure source (0.3 MPa), a  
73 DA/AD converter (NI USB-6363, National Instruments, Austin, TX, USA), a personal  
74 computer (FMV BIBLO, Fujitsu, Tokyo, Japan; PC), and NI LabVIEW 2010 software  
75 (National Instruments). The pressure was applied to two reservoirs to convert air pressure to  
76 liquid pressure: one reservoir was filled with the buffer, and the other one was filled with 1.06  
77 mM of uranine fluorescent dye solution (CI-45350, Tokyo Chemical Industry, Tokyo, Japan).  
78 An aortic sample was placed downstream of the reservoirs. Both ends of the aortic sample were  
79 tied to hypodermic needles (NN-2332R, Terumo, Tokyo, Japan) with suture threads (C-23-N2  
80 7-0, Natsume Seisakusho, Tokyo, Japan), and the needles were fixed on a tissue bath. The  
81 sample was stretched in its longitudinal direction until the intervals of the length marker  
82 reached 3 mm. A pressure transducer (DX-300, Nihon Kohden, Tokyo, Japan) at the  
83 downstream side of the sample measured the pressure inside the tube through a strain amplifier  
84 (DPM-911B, Kyowa Electronic Instruments, Chofu, Japan), the DA/AD converter, and the  
85 software installed on the PC. The downstream side of the tube was connected to an outlet bath  
86 through a three-way valve (no. 3 in Fig. 1).

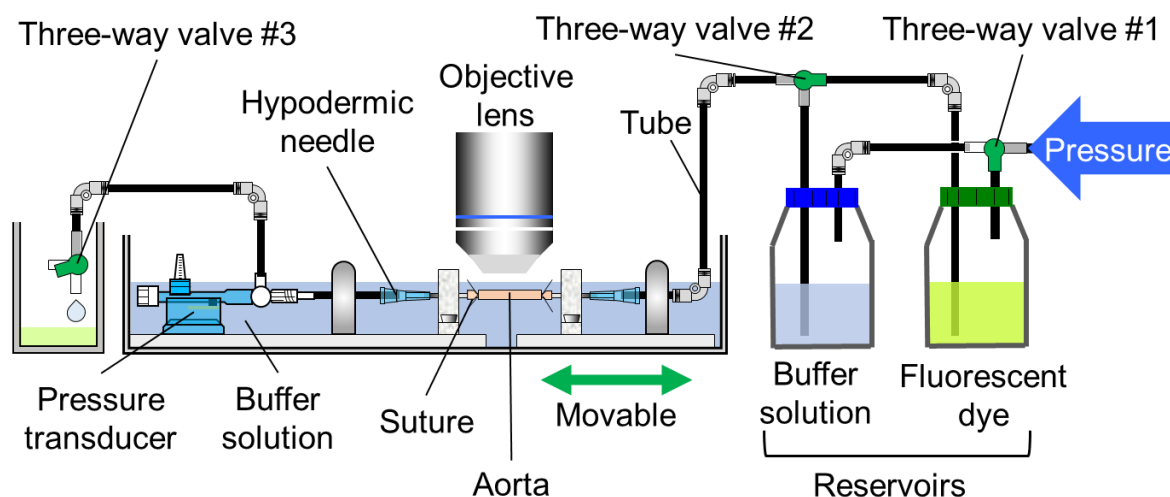

87

88 **Fig. 1** Schematic of experimental device for applying intraluminal pressure to a vessel. This  
89 device is a slightly modified version of the one fabricated in Sugita et al. (2017).

90

### 91 **Fluorescent microscopy**

92 Fluorescent light was observed under a two-photon microscope (FV1200MPE,  
93 Olympus, Tokyo, Japan). A Ti:sapphire laser (wavelength: 800 nm, strength: 2.0%) was applied  
94 to the sample through a 60× objective lens (LUMPLFLN60XW, Olympus) and a V/G filter  
95 (FV-10-MRV/G, Olympus). To specify the position of the aorta, autofluorescence from the  
96 elastin in the aorta was mainly observed in a V-channel bandpass filter (420–460 nm). The  
97 fluorescent light of the fluorescent dye solution was imaged using a G-channel bandpass filter  
98 (495–540 nm).

99

### 100 **Experimental protocol**

101 The intraluminal pressure  $P$  was set at 40 mmHg, and only the buffer was introduced  
102 into the aorta by switching three-way valves nos. 1 and 2 (Fig. 1). The flow rate was controlled  
103 such that the difference between the set and the measured pressures did not exceed 10 mmHg  
104 with three-way valve no. 3. The ELs were imaged in the plane perpendicular to the radial ( $r$ )  
105 direction, with an image size of 1 pixel (0.41  $\mu\text{m}$ ) in the longitudinal ( $z$ ) and 512 pixels (211.97  
106  $\mu\text{m}$ ) in the circumferential ( $\theta$ ) directions. By moving the objective lens in the  $r$ -direction in  
107 steps of 0.41  $\mu\text{m}$ , the  $r$ - $\theta$  cross-sectional image was obtained.

108           The fluorescent dye solution was introduced into the aorta by switching three-way  
109 valves nos. 1 and 2. The aorta was imaged as stated above as a time-lapsed image with an  
110 interval of 2.7–3.5 s. Image capture was continued for 3–5 min. After imaging, the buffer  
111 solution was reintroduced into the aorta to wash out the fluorescent solution. The new position  
112 in the sample was then selected, and intraluminal pressurization and image capture were  
113 similarly repeated at 80, 120, and 160 mmHg.

114           All experiments were completed within 24 h after the resection of the sample.

115

### 116 **Image analysis**

117           Image analysis was performed using image analysis software (ImageJ 1.52a,  
118 National Institutes of Health, Bethesda, MD, USA). Figure 2 shows a schematic of the image  
119 analysis process. The drift of the time-lapsed image stack obtained as described above was  
120 compensated by performing image correlation. The chord length and camber of the arch of any  
121 EL were measured, a circle was fitted to the EL, and its center coordinates were determined  
122 (Fig. 2a). By regarding the center coordinates as the origin of the polar coordinates, the image  
123 stack with polar coordinates was converted to an image stack with Cartesian coordinates (Fig.  
124 2b). The converted radial direction still has an image resolution of 0.41  $\mu\text{m}/\text{pixel}$ . The image  
125 stack was converted to time-lapsed images with 1-s intervals by linearly compensating every  
126 two sequential images.

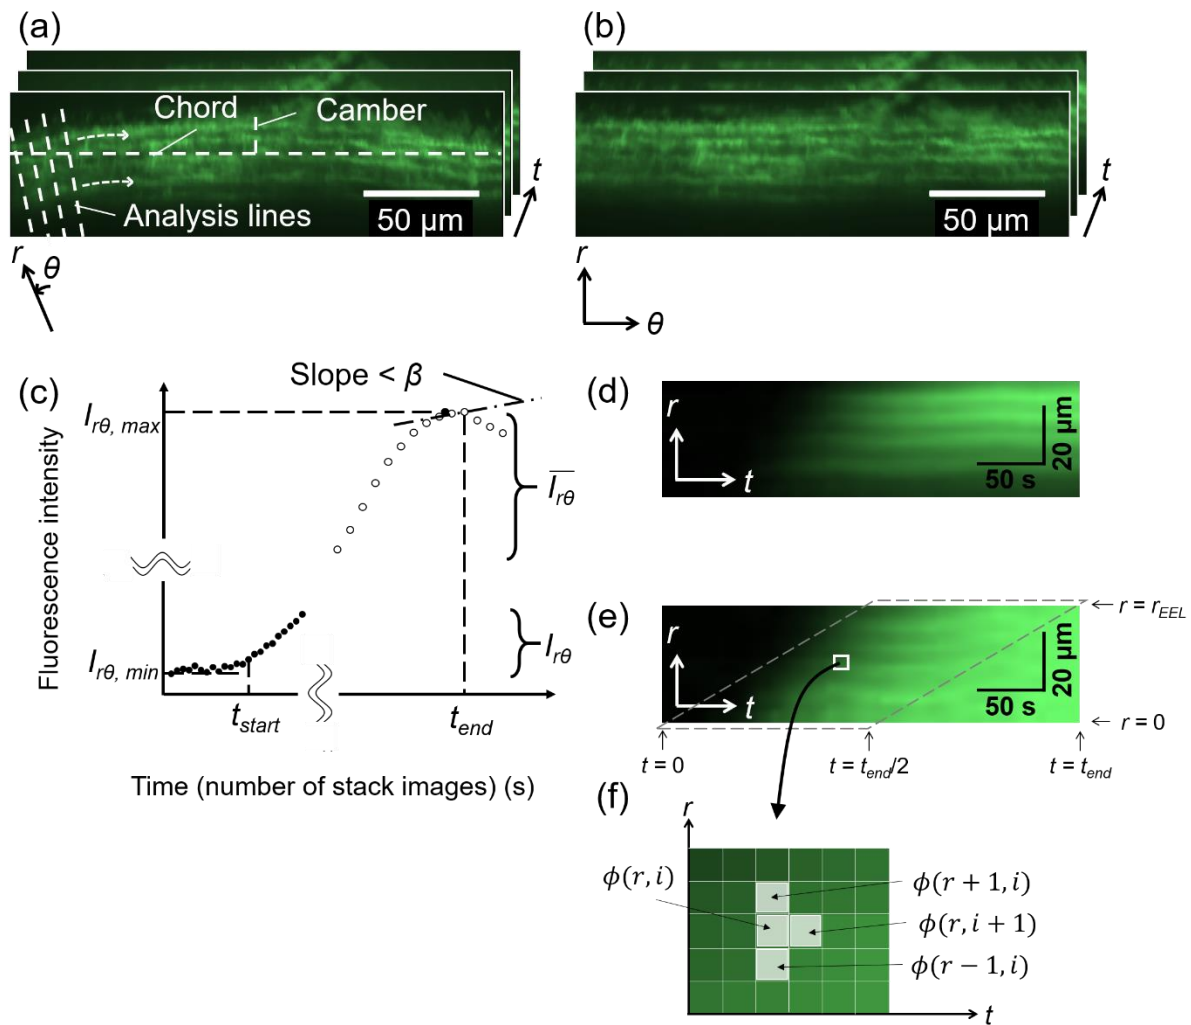

127

128 **Fig. 2** Schematic of image analysis. (a) An image stack of fluorescent dye captured in the  
 129 radial-circumferential ( $r$ - $\theta$ ) plane. (b) To convert the image of the aortic wall on an arch to  
 130 images of a flattened one, the chord and camber lengths were measured from any arbitrary EL  
 131 (outermost layer in this figure) and the center coordinates of the arc were determined. An  
 132 analysis line was drawn from the center coordinates to an arbitrary position on the left edge of  
 133 the images and rotated clockwise around the center coordinates. The fluorescence intensity on  
 134 each line was recorded, and the image stack was reproduced from the intensity data. (c)  
 135 Identification of start time  $t_{start}$  and end time  $t_{end}$ . The average fluorescence intensity  $I_{r\theta}(t)$  in  
 136 the aortic region of each slice was measured (closed circles), and the minimum  $I_{r\theta,min}$  and  
 137 maximum  $I_{r\theta,max}$  were measured.  $t_{start}$  was defined as the time  $t$  when  $I_{r\theta}(t)$  slightly  
 138 exceeded  $I_{r\theta,min}$  (see main text for precise definition). The moving average of the  
 139 fluorescence intensity  $\overline{I_{r\theta}}(t)$  (open circles) was calculated, and  $t_{end}$  was defined as the time  $t$



140 when  $\{\overline{I_{r\theta}}(t) - \overline{I_{r\theta}}(t - 1)\}$  first became less than  $\beta$ . (d) A kymograph obtained by reslicing  
141 image (b) and averaging it on the  $\theta$ -axis. (e) A normalized kymograph with 0 at  $t_{start}$  and 1 at  
142  $t_{end}$ . Normalization was performed at each  $r$ -coordinate. Further image analysis was performed  
143 in the region bordered by the broken line. (f) Magnified view of the kymograph. The  
144 differential of the intensity was calculated for each pixel. These images were taken at 80 mmHg.  
145

146 There was a time delay until the fluorescent solution reached the sample position  
147 from the reservoir after the valves were opened. Thus, the start time  $t_{start}$  of the analysis was  
148 determined from the fluorescent intensity changes (Fig. 2c). First, the average intensity  $I_{r\theta}(t)$   
149 of the image in the aortic region was calculated at each slice (*i.e.*, each time  $t$ ), and its maximum  
150  $I_{r\theta,max}$  and minimum  $I_{r\theta,min}$  were determined. Then, the time  $t$  when  $\{I_{r\theta}(t) - I_{r\theta,min}\}$   
151 first exceeded  $\alpha$  times the difference between  $I_{r\theta,max}$  and  $I_{r\theta,min}$ , that is,

$$I_{r\theta}(t) - I_{r\theta,min} \geq (I_{r\theta,max} - I_{r\theta,min}) \times \alpha \quad (1)$$

152 was determined as  $t_{start}$ . Then, the moving average  $\overline{I_{r\theta}}(t)$  was calculated for time duration  
153  $t_{MA}$  as

$$\overline{I_{r\theta}}(t) = \sum_{t'=t-t_{MA}}^t \frac{I_{r\theta}(t')}{t_{MA}} \quad (2)$$

154 The end time  $t_{end}$  of the analysis was determined as the time when changes in  $\overline{I_{r\theta}}(t)$  first  
155 became less than  $\beta$  after  $t_{start}$  (Fig. 2c). In this study,  $\alpha = 0.5\%$ ,  $t_{MA} = 10$  s, and  $\beta = 1$  were  
156 selected. In the following analysis, only the time-lapsed images between  $t_{start}$  and  $t_{end}$  were used.  
157 The  $r$ - $\theta$  plane image stack was resliced into the  $r$ - $t$  plane image stack to obtain the so-called  
158 kymograph stack, and this stack was then averaged in the  $\theta$  direction (Fig. 2d). Images of only  
159 the media, from the internal to the external ELs, were cropped, and the image size was reduced  
160 to one-fifth the original for averaging the local intensities. The intensity  $I_{rt}(r, t_{start})$  was  
161 subtracted from the intensity  $I_{rt}(r, t)$  at the coordinates  $(r, t)$  in the kymograph to remove  
162 the background value as follows:

$$I'_{rt}(r, t) = I_{rt}(r, t) - I_{rt}(r, t_{start}) \quad (3)$$

163 Then, the obtained intensity  $I'_{rt}(r, t)$  was normalized by the intensity  $I'_{rt}(r, t_{end})$  at  $t_{end}$  as  
164 follows (see Fig. 2e):

$$I''_{rt}(r, t) = I'_{rt}(r, t)/I'_{rt}(r, t_{end}) \quad (4)$$

165 This process was performed to eliminate the effect of the difference in the intensity in the radial  
 166 direction because the light at deeper tissues (intimal side) tends to be weak and dispersed owing  
 167 to the long distance from the objective lens. The obtained intensity  $I''_{rt}(r, t)$  in the  $r$ - $t$  plane  
 168 was used in the following analysis.

169

## 170 Calculation of velocity and diffusion coefficient

171 To measure the interstitial flow in the  $r$ -axis, the following one-dimensional  
 172 advection-diffusion equation was used:

$$\frac{\partial \phi}{\partial t} + v \frac{\partial \phi}{\partial r} - k \frac{\partial^2 \phi}{\partial r^2} = 0 \quad (5)$$

173 Here,  $\phi$  is the concentration of the fluorescent solution;  $v$ , the interstitial flow velocity; and  $k$ ,  
 174 the diffusion coefficient. The discretization of Eq. (5) gives

$$\begin{aligned} \frac{\phi(r, t+1) - \phi(r, t)}{\Delta t} + v \frac{\phi(r+1, t) - \phi(r, t)}{\Delta r} \\ - k \frac{\phi(r+1, t) - 2\phi(r, t) + \phi(r-1, t)}{(\Delta r)^2} = 0 \end{aligned} \quad (6)$$

175 where  $\phi(r, t)$  is the concentration at a coordinate  $(r, t)$  in the kymograph (see Fig. 2f). The  
 176 coefficient of each term in Eq. (6) is expressed as

$$a = \frac{\phi(r, t+1) - \phi(r, t)}{\Delta t}, \quad b = \frac{\phi(r+1, t) - \phi(r, t)}{\Delta r}, \quad c = \frac{\phi(r+1, t) - 2\phi(r, t) + \phi(r-1, t)}{(\Delta r)^2}. \quad (7)$$

177 Eq. (6) is then expressed as

$$a' = vb' + k, \quad (8)$$

178 where

$$a' = \frac{a}{c}, \quad b' = -\frac{b}{c}. \quad (9)$$

179 The intensity in the normalized kymograph shown in Fig. 2e was considered to reflect the  
 180 concentration of the fluorescent dye (see Supplementary Material S1):

$$\phi(r, t) = I''_{rt}(r, t). \quad (10)$$

181 Further, the application of Eq. (6) to each pixel in the kymograph produced many combinations  
 182 of  $(a', b')$ . These combinations were plotted on a graph with ordinate  $a'$  and abscissa  $b'$ . To

183 eliminate the small intensity changes that often produce extremely high values in the  
184 calculation of the differentiation, the kymograph in the ranges with

$$\frac{2r_{EEL}}{t_{end}}t - r_{EEL} \leq r \leq \frac{2r_{EEL}}{t_{end}}t \quad \text{for } 0 \leq r \leq r_{EEL} \quad (11)$$

185 were used for further analysis, where  $r_{EEL}$  is the radial coordinate at the external elastic lamina  
186 (EEL, Fig. 2e). The extreme data ( $a'$ ,  $b'$ ) were excluded using the modified Stahel-Donoho  
187 method (Wada, 2010) in R software (v. 3.5.1, University of Auckland, Auckland, North Island,  
188 NZ). A linear line was fitted to the plots ( $a'$ ,  $b'$ ) with a least-squares regression, and the slope  
189 and  $b'$ -axis intercept were determined as  $v$  and  $k$ , respectively, by using Eq. (8).

190

### 191 **Distribution of interstitial flow velocity in radial direction**

192 The distribution of the interstitial flow velocity in the radial direction was measured.  
193 In the kymograph image, a local area with a length of 5–10 pixels (ca. 2–4  $\mu\text{m}$ ) in the radial  
194 direction was selected in the EL and SML regions for the autofluorescence image of elastin.  
195 From the intimal side, these ELs were named EL1, EL2, , and EL3, and the SMLs were named  
196 SML1, SML2, and SML3. Then, the abovementioned process was applied to the image to  
197 obtain  $v$ , except that the image size was reduced to one-fifth the original for averaging the local  
198 intensities.

199 To determine the radial position of the local area image, the normalized distance  $d$   
200 from the internal elastic lamina (IEL) was calculated as the distance from the IEL divided by  
201 the distance between the IEL and the EEL.

202

### 203 **Statistical method**

204 The correlation coefficients  $R$  between plots such as  $a'$ - $b'$ ,  $v$ - $P$ ,  $k$ - $P$ , and  $v$ - $d$  were  
205 tested using Student's  $t$ -test. The velocity difference between SMLs was tested using the Steel-  
206 Dwass test. Data were expressed as mean  $\pm$  SD. A significance level of  $p = 0.05$  was used.

207

## 208 **Results**

### 209 **Observation of fluorescent solutions during intraluminal pressurization**

210 Figure 3 and Movie 1 show raw time-lapsed images of the fluorescent solution in the  
211 thoracic aorta in the  $r$ - $\theta$  plane under intraluminal pressurization. After the fluorescent solution  
212 reached the aorta from the reservoir, a high-intensity area spread from the bottom (i.e., intimal  
213 side) to the top (i.e., adventitial side). The high intensity reached the adventitial side more  
214 quickly under a higher intraluminal pressure. Although this is the fluorescent dye channel  
215 image and not the main elastin autofluorescence channel, the EL was clearly observed after the  
216 fluorescent dye reached the aortic walls.

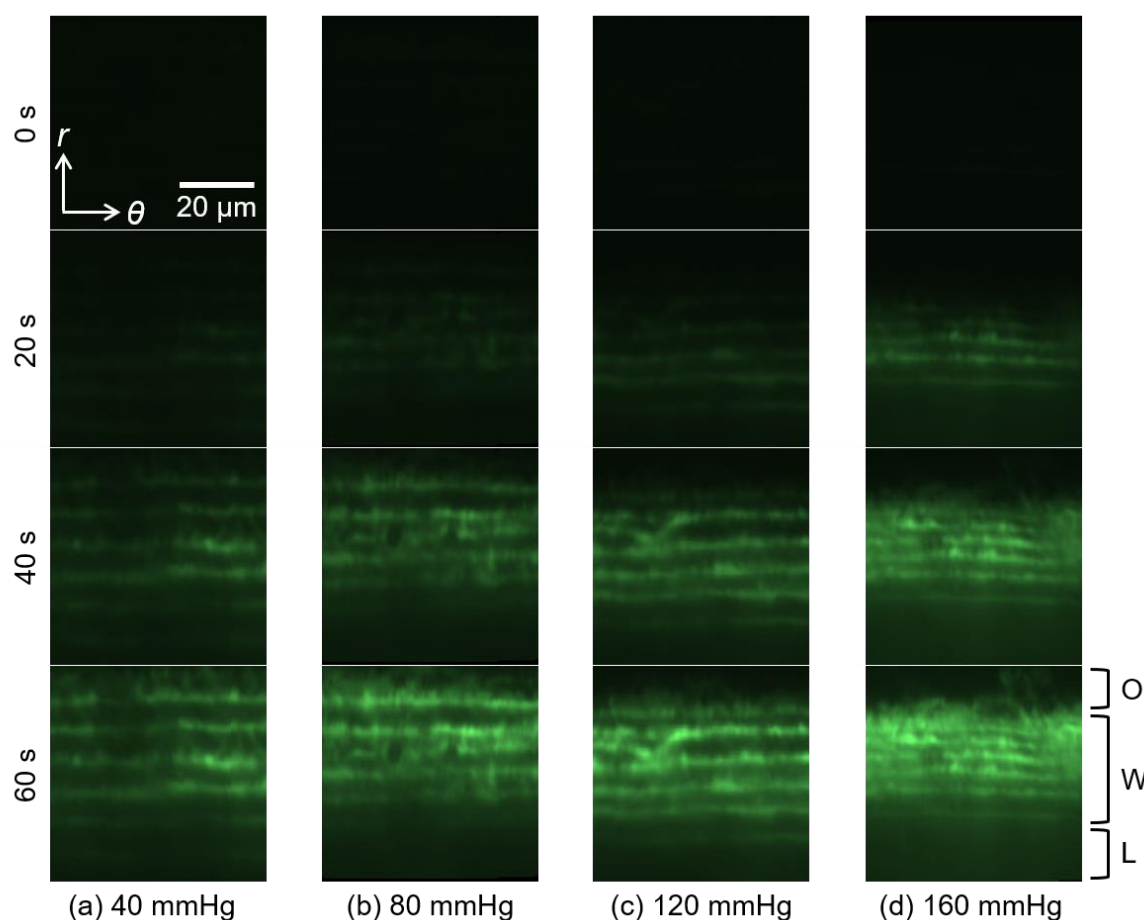

217 (a) 40 mmHg (b) 80 mmHg (c) 120 mmHg (d) 160 mmHg  
218 **Fig. 3** Time-lapsed images of fluorescence in the aortic walls in the radial-circumferential ( $r$ -  
219  $\theta$ ) cross-section at intraluminal pressures of (a) 40, (b) 80, (c) 120, and (d) 160 mmHg at 0, 20,  
220 40, and 60 s after  $t_{\text{start}}$ . From the top to the bottom sides, the outside of the aorta (O), aortic wall  
221 (W), and lumen (L) are shown.

222

223 Figure 4 shows the kymographs at 40, 80, 120, and 160 mmHg. These kymographs  
224 show the movement of the higher intensity from the intimal to the adventitial side, indicating

225 that the fluorescent dye flows through the aortic walls. Furthermore, the time length of the  
226 kymograph tended to be shorter at higher intraluminal pressures, indicating that the fluorescent  
227 intensity at higher pressure reached a stable state more quickly. In this kymograph, stripe  
228 patterns were also seen under all pressure conditions. The higher-intensity regions in the strip  
229 patterns correspond to the region of ELs.

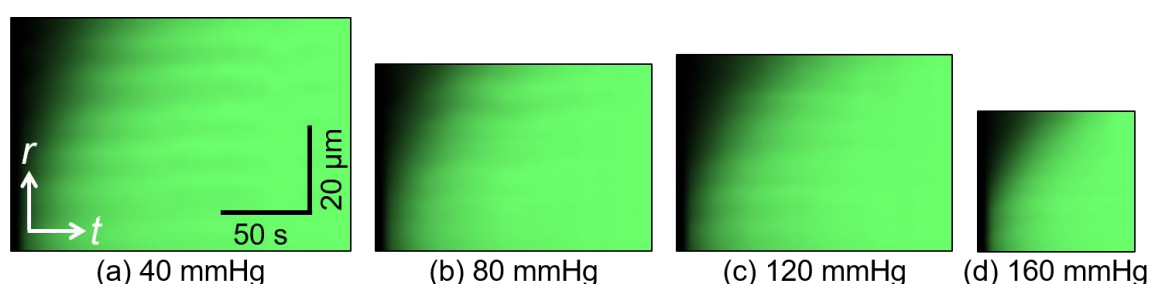

231 **Fig. 4** Kymograph of fluorescent dye solution at intraluminal pressures of (a) 40, (b) 80, (c)  
232 120, and (d) 160 mmHg.  $t$ , time axis;  $r$ , radial axis. These images were obtained from the  
233 images shown in Fig. 3.

234

#### 235 **Interstitial flow velocity and diffusion coefficient in analysis of whole thickness**

236 Figure 5 shows typical graphs of combinations of ( $a'$ ,  $b'$ ). The density of the plots  
237 was high from the bottom left to the top right, indicating that the velocity expressed as the slope  
238 of the fitted line is positive. The slope of the fitting line increased with increasing pressure, as  
239 given by  $a' = 0.06b' + 0.12$  at 40 mmHg (Fig. 5a),  $a' = 0.28b' + 0.19$  at 80 mmHg (Fig. 5b),  
240  $a' = 0.40b' + 0.34$  at 120 mmHg (Fig. 5c), and  $a' = 0.59b' + 0.98$  at 160 mmHg (Fig. 5d). The  
241 number of plots tended to decrease at higher intraluminal pressures because the image sizes of  
242 the kymograph under such conditions were small (Fig. 4).

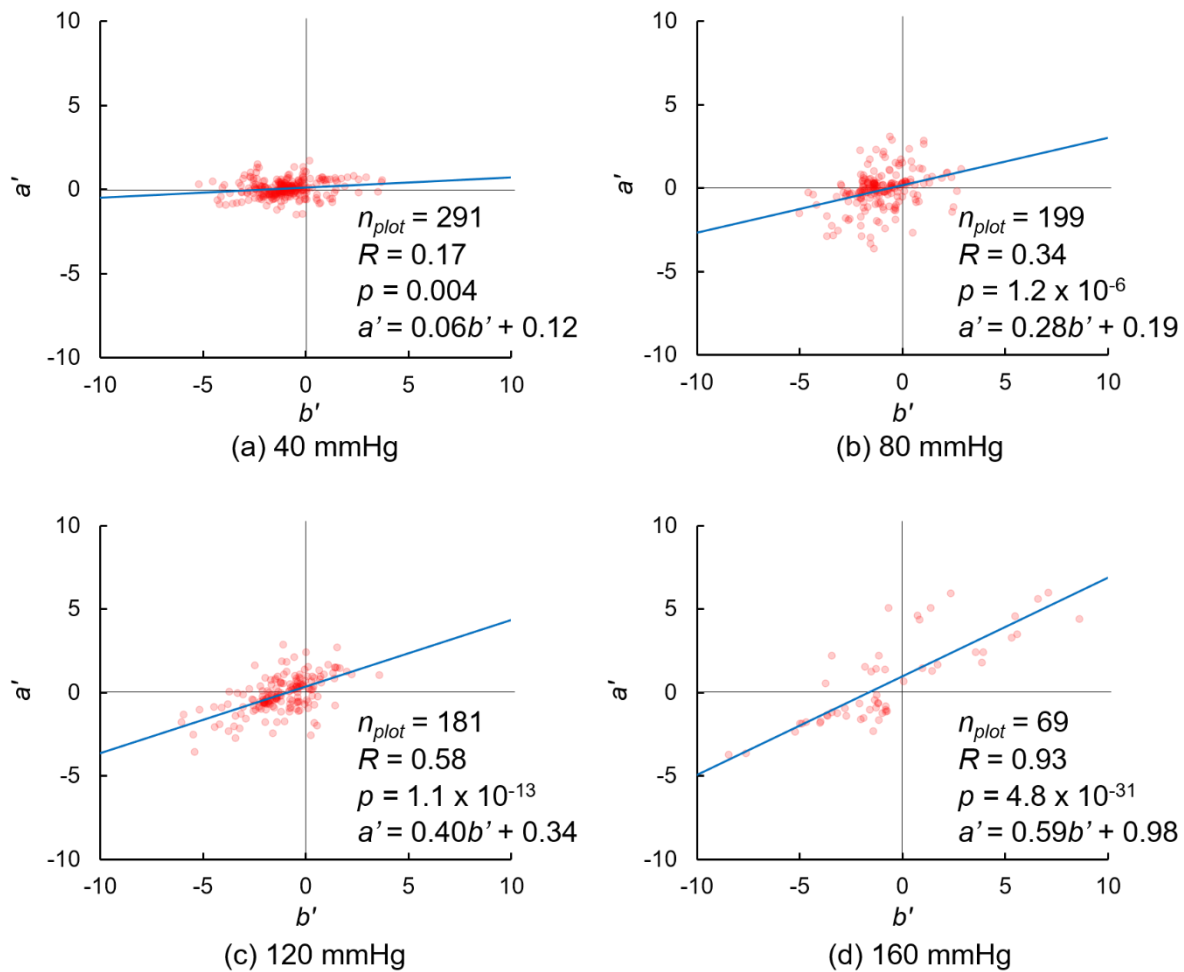

243

244 **Fig. 5** Plots of  $a'$  and  $b'$  as given by Eq. (8) at intraluminal pressures of (a) 40 mmHg, (b) 80  
 245 mmHg, (c) 120 mmHg, and (d) 160 mmHg.  $n_{plot}$ , number of plots. These graphs are obtained  
 246 from the images shown in Figs. 3 and 4.

247

248 Figure 6 shows plots of the interstitial flow velocity  $v$  and diffusion coefficient  $k$   
 249 against the pressure  $P$ . Because a significant correlation between  $a'$  and  $b'$  was not obtained  
 250 from data at 80 mmHg and the adventitial side was destroyed owing to the laser as indicated  
 251 by the data at 160 mmHg, those data were not used in the following analysis. The velocities  $v$   
 252 were  $0.23 \pm 0.16 \mu\text{m/s}$  at 40 mmHg ( $n = 13$ ),  $0.34 \pm 0.15 \mu\text{m/s}$  at 80 mmHg ( $n = 10$ ),  $0.40 \pm$   
 253  $0.23 \mu\text{m/s}$  at 120 mmHg ( $n = 11$ ), and  $0.40 \pm 0.27 \mu\text{m/s}$  at 160 mmHg ( $n = 10$ ). Further, the  
 254 diffusion coefficients  $k$  were  $0.24 \pm 0.18 \mu\text{m}^2/\text{s}$  at 40 mmHg ( $n = 13$ ),  $0.41 \pm 0.22 \mu\text{m}^2/\text{s}$  at 80  
 255 mmHg ( $n = 10$ ),  $0.35 \pm 0.29 \mu\text{m}^2/\text{s}$  at 120 mmHg ( $n = 11$ ), and  $0.56 \pm 0.47 \mu\text{m}^2/\text{s}$  at 160 mmHg  
 256 ( $n = 10$ ). Both  $v$  and  $k$  increased with increasing pressure  $P$ , and the correlation coefficients for

257 the  $P$ - $v$  and  $P$ - $k$  relationships were significant.

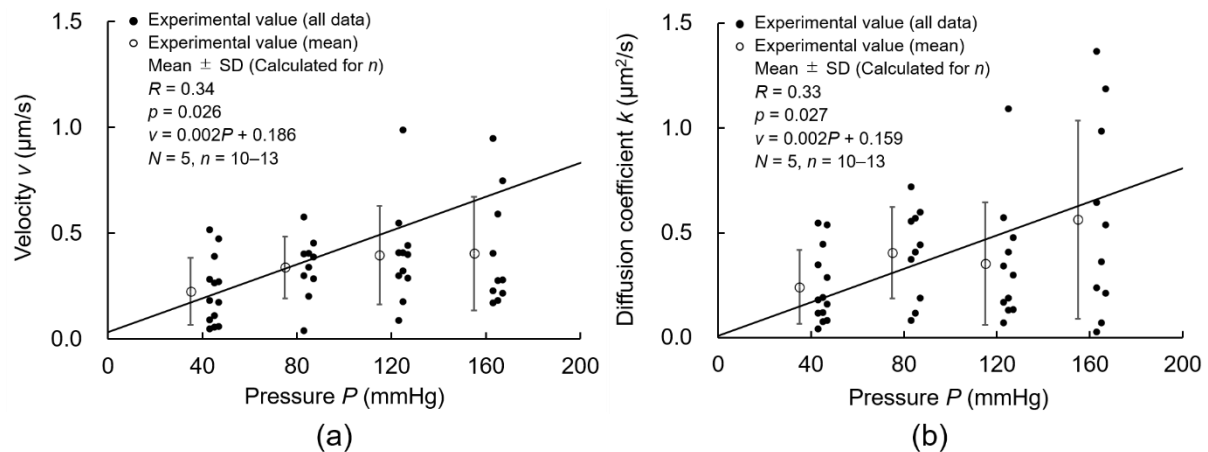

258

259 **Fig. 6** Correlations between intraluminal pressure  $P$  and both (a) interstitial flow velocity  $v$

260 and (b) diffusion coefficient  $k$ .  $N$ , Number of mice;  $n$ , Number of data;  $R$ , correlation

261 coefficient.

262

### 263 **Velocity distribution in radial direction**

264 Figure S2.1 shows the kymograph in the local EL and SML regions. The intensity

265 change in the radial direction was negligible, whereas that in the time direction was

266 recognizable. Figure S2.2 shows the plots of  $a'$  and  $b'$  in the EL and SML regions. Significant

267 correlations were obtained, as seen in the analysis for the whole wall thickness (Fig. 5). The

268 slope of the relationship between  $a'$  and  $b'$  was steeper in the SML region and intimal side.

269 Figure S2.3 shows the slope, that is, the interstitial flow velocity  $v$ . In ELs, these velocities

270 were lower or sometimes negative. Thus, the reliability of the velocity in ELs was not enough,

271 and only the SML data were used. Figure 7 shows the interstitial flow velocity  $v$  in the SMLs

272 plotted to the normalized radial position  $d$  for all pressure levels. Negative and significant

273 correlations were found at 80–160 mmHg, whereas the  $p$ -value of the relationship at 40 mmHg

274 was slightly larger than 0.05. Figure 8 shows the interstitial flow velocity  $v$  in SML1–SML3.

275 At 120 and 160 mmHg,  $v$  in SML1 was significantly higher than that in SML2 and SML3. At

276 40 and 80 mmHg,  $v$  in SML1 tended to be higher than that in other SMLs, and significant

277 differences were not seen. These results indicate that the interstitial flow velocity is higher on

278 the intimal side than on the adventitial side.

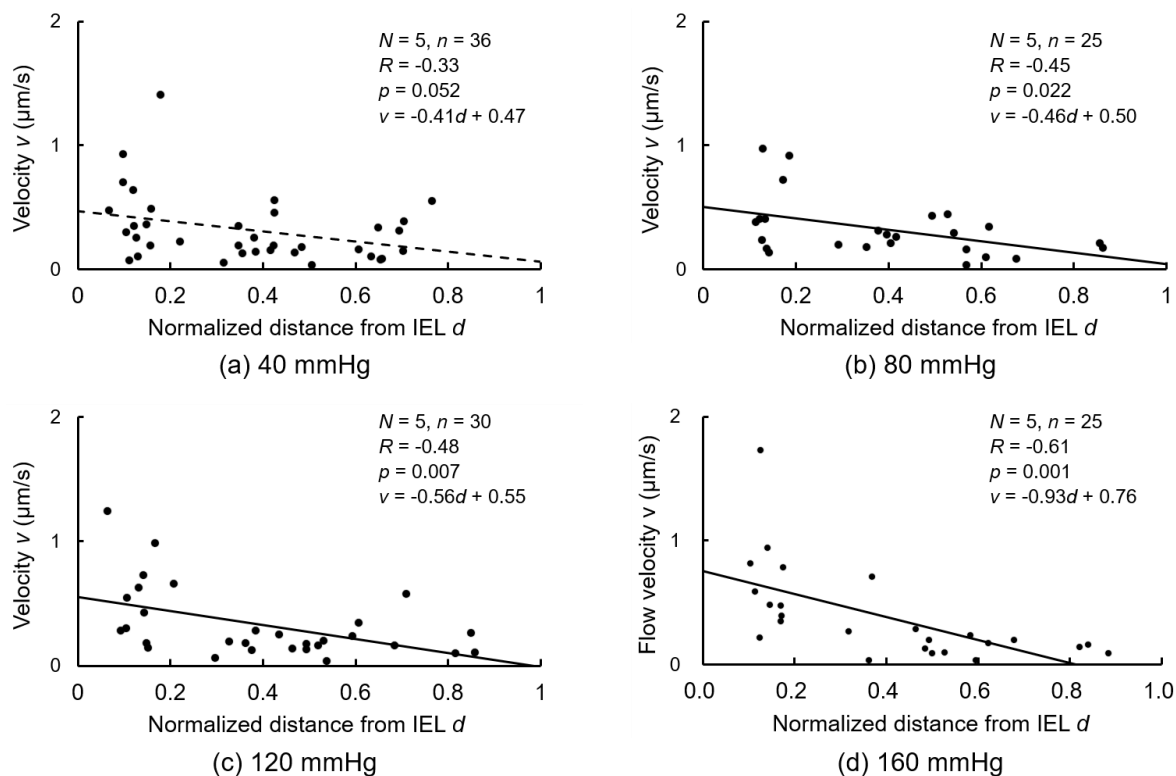

279

280 **Fig. 7** Correlations between normalized distance  $d$  from the IEL and interstitial flow velocity

281  $v$  at intraluminal pressure  $P$  of (a) 40, (b) 80, (c) 120, and (d) 160 mmHg.  $N$ , Number of mice;

282  $n$ , Number of data;  $R$ , correlation coefficient.

283

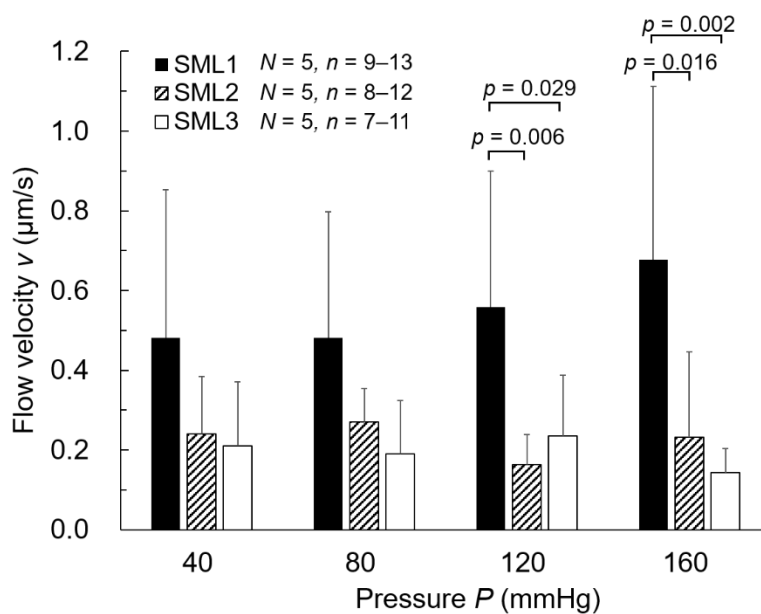

284

285 **Fig. 8** Comparison of flow velocity  $v$  between SML1–SML3.  $N$ , Number of mice;  $n$ , Number

286 of data.



287

## 288 **Discussion**

289           In this study, we proposed a novel method to quantify the local interstitial flow  
290 velocity in the aortic wall. Upon applying an intraluminal pressure to the mouse thoracic aorta,  
291 the fluorescent dye solution introduced in the lumen was observed to move from the intimal to  
292 the adventitial side under a two-photon microscope. By applying a one-dimensional advection-  
293 diffusion equation to time-lapsed images of the fluorescence intensity, the flow velocity and  
294 diffusion coefficient were successfully obtained. This study makes the following main  
295 contributions: (1) it proposes a novel method to observe the flow through the change in the  
296 concentration of the fluorescent dye, (2) it directly observes the higher interstitial flow velocity  
297 in the radial direction under higher intraluminal pressure, and (3) it reveals the higher  
298 interstitial flow velocity in the intimal side of the aorta.

299           The interstitial flow in the aorta increased with increasing pressure at its lumen, in  
300 keeping with previous studies (Baldwin & Wilson, 1993; Baldwin et al., 1992). In these  
301 studies, the hydraulic conductance was almost constant regardless of the intraluminal pressure,  
302 indicating that the flow velocity increased with an increase in the intraluminal pressure. The  
303 interstitial flow was affected by not only the pressure difference but also the changes in the  
304 aortic thickness. A decrease in the wall thickness, which was measured as the distance between  
305 the IEL and the EEL, was also found with increased intraluminal pressure (Fig. S3.1). Thus,  
306 we concluded that the increase in the pressure and the decrease in the wall thickness both  
307 increase the interstitial flow velocity.

308           This study directly and experimentally demonstrated higher interstitial flow velocity  
309 in the intimal side of the SML (Fig. 7). When the continuum theory is applied to the inner and  
310 outer surfaces, the interstitial flow velocity at the inner surface must be higher than that at the  
311 outer surface, because the outer surface area is larger owing to the cylindrical shape of the aorta.  
312 However, the maximum rate of decrease in the velocity was estimated to be only 8%. The  
313 curvature radius of the ELs at the intimal and adventitial sides was  $\sim 990 \mu\text{m}$  and  $\sim 1080 \mu\text{m}$ ,  
314 respectively; in other words, the intimal surface area was 8% smaller than the adventitial  
315 surface area at 40 mmHg. The fitting lines in Fig. 7 indicate a much larger rate of decrease at

316 the outer surface compared to that at the inner surface. Thus, other factors must influence the  
317 higher interstitial flow velocity in the more intimal side of the aorta. Through simulations,  
318 Huang et al. (1994) revealed much faster flow at the fenestral pores in the IEL, and Tada and  
319 Tarbell (2000, 2002) predicted that the flow through the pores was jet flow. Thus, fenestral pores  
320 might influence the faster flow in the intimal side.

321 Hypertensive rats showed aortic thickening, especially in the intimal side  
322 (Matsumoto & Hayashi, 1996); this might have been caused by the faster interstitial flow in  
323 the intimal side, as shown in this study. SMCs in collagen gel subjected to a pressure of 0.005  
324 Pa reduced the production of contractile-type proteins, indicating that they changed into a  
325 synthetic phenotype (Shi et al., 2010). Changes to the synthetic type improve the synthesis of  
326 collagen (Sjölund et al., 1986). Because an increase in ground substances was also seen in  
327 hypertensive rats (Matsumoto & Hayashi, 1996), the higher shear stress induced by faster fluid  
328 flow might be a cause of the aortic thickening seen in hypertension. This issue requires further  
329 investigation.

330 In this study, the interstitial flow velocity in the *ex vivo* mice aorta was respectively  
331 measured to be 0.34 and 0.40  $\mu\text{m/s}$  at 80 and 120 mmHg on average; these values were higher  
332 than previously reported ones. The velocity in *ex vivo* aortas at 100 mmHg was reported as  
333 0.055  $\mu\text{m/s}$  (Vargas et al., 1979), 0.052  $\mu\text{m/s}$ , (Baldwin et al., 1992), and 0.045  $\mu\text{m/s}$  (Baldwin  
334 & Wilson, 1993) in rabbits and  $\sim 0.03$   $\mu\text{m/s}$  (Shou et al., 2006), 0.025  $\mu\text{m/s}$  (Nguyen et al.,  
335 2015), and  $\sim 0.03$   $\mu\text{m/s}$  (Toussaint et al., 2017) in rats. Various factors might cause these  
336 velocity differences. The most likely factor is that in this study, unlike in previous studies, the  
337 adventitia was removed to observe the fluorescence in the media. Because the adventitia seems  
338 to resist the interstitial flow, their removal might result in the higher interstitial flow in this  
339 study. The second-most likely factor is the absence of endothelial cells (ECs). The interstitial  
340 flow velocity with ECs is higher than that without ECs (Baldwin & Wilson, 1993; Lu et al.,  
341 2013; Shou et al., 2006; Tedgui & Lever, 1984; Toussaint et al., 2017). Baldwin and Wilson  
342 (1993) reported that the interstitial flow velocity with ECs was 2.2 times larger than that  
343 without ECs at 100 mmHg. Although we have not confirmed the existence of ECs in the present  
344 study, ECs might have been removed by the experimental process. For example, the

345 introduction of air into the aorta (Ralevic et al., 1989) and the buckling of the IEL owing to the  
346 removal of the intraluminal pressure (Baldwin et al., 1982) can detach the ECs. In the present  
347 study, the intraluminal side of the aortic specimen was exposed to the air and depressurized  
348 when the aorta was isolated from the animal body. These processes might peel the ECs off,  
349 thereby increasing the velocity. The third-most likely factor is the viscosity of the solution.  
350 Tarbell et al. (1988) reported that the viscosity of the Krebs solution is 0.81 times that of a  
351 solution containing 4% bovine serum albumin, and the interstitial flow without albumin is 1.8  
352 times faster at 110 mmHg. Thus, the interstitial flow without albumin might have increased  
353 velocity in this study. Considering the previous two factors, namely, the effects of EC removal  
354 and the existence of albumin, the magnitude of the interstitial flow velocity was considered  
355 comparable to that of previously reported velocities. The other possible factors, though these  
356 are considered unlikely, are the differences in the animals and the laser scanning. With regard  
357 to the effect of the laser, scanning using the two-photon microscope was performed from the  
358 intimal to the adventitial side at a speed of 25  $\mu\text{m/s}$  in the radial direction. The interstitial flow  
359 velocity for all data in this study was 0.39  $\mu\text{m/s}$ ; this results in a 1.6% error in the interstitial  
360 flow velocity.

361         Although the abovementioned factors might have resulted in the higher interstitial  
362 velocity in our study, the actual flow velocity in the aorta might be higher than the interstitial  
363 velocity in previous studies. Previous studies reported the averaged interstitial velocities  
364 determined by dividing the flow rate by the area of the intraluminal surface. However, the  
365 actual area where liquid can flow in the aorta is smaller owing to the existence of the  
366 extracellular matrix and cells. Thus, the interstitial flow velocities measured in the previous  
367 studies underestimate the actual liquid flow velocity. Tedgui and Lever (1987) reported that the  
368 extracellular space was ~40% in the media at 70 mmHg. If the area in which the liquid can  
369 flow in the radial direction is 40% of the total area of the intraluminal surface, the actual flow  
370 velocity is 2.5 times the interstitial velocity measured in previous studies. However, differences  
371 still exist between the interstitial flow in previous studies and our study. Therefore, this issue  
372 will also require further investigation.

373         The proposed method to measure the interstitial flow velocity differs from previous

374 methods, in which the total volume of the liquid eluted from the aorta was measured and  
375 divided by the surface area, in several ways (Baldwin & Wilson, 1993; Baldwin et al., 1997;  
376 Baldwin et al., 1992; Chooi et al., 2016; Deng et al., 1998; Lever et al., 1992; Lu et al., 2013;  
377 Nguyen et al., 2015; Shou et al., 2006; Tarbell et al., 1988; Wang et al., 2019). First, it can  
378 directly observe the interstitial flow in the aorta. Thus, the local difference in the interstitial  
379 flow can be investigated in the  $z$ -,  $\theta$ -, and even  $r$ -directions, unlike in previous studies.  
380 Specifically, because the structure of ELs and SMLs is quite different, there might be a big  
381 difference between SMLs and ELs that might affect the local velocity in the  $r$ -direction. Second,  
382 it can measure the velocity for a limited time; by contrast, previous methods do not have a time  
383 limitation. Because the measurements using the proposed method depend on changes in the  
384 concentration of the fluorescent dye solutions, they cannot be performed after the concentration  
385 reaches a stable value.

386         The interstitial flow velocity  $v$  was obtained under several assumptions. First, we  
387 assumed a constant flow velocity during the experiment. Further, Lever et al. (1992) reported  
388 that the velocity decreased with time for  $\sim 10$  min after intraluminal pressurization. Because the  
389 present study measures the velocity for a few minutes after pressurization, the interstitial flow  
390 velocity in the stable state might be lower than that observed in this study. The aorta is  
391 viscoelastic, and we have often observed its outward movement during pressurization.  
392 However, the aortic thickness remains almost constant (Fig. S3.1), and the effect of the  
393 viscoelasticity of the aorta should be negligibly small. Second, we considered that the  
394 fluorescent intensity reflected the concentration of the fluorescent dye solution. This is because  
395 the investigation of the relationship between the intensity and the concentration showed a  
396 significant and strong correlation (see Supplementary Materials S1), indicating that the  
397 intensity can be used as a concentration index.

398         An EL-like structure, namely, a stripe pattern, was observed in the fluorescent dye  
399 solution image (Fig. 3). Because a high intensity was not observed at the start time  $t_{start}$ , this  
400 should not be the autofluorescence from elastin. When an aorta was sectioned perpendicular to  
401 the longitudinal direction and immersed in the fluorescent dye solution without pressurization,  
402 following which the dye was washed out with the buffer, a higher intensity was observed in

403 ELs than in SMLs (see Supplementary Materials S4). Therefore, we assume that more  
404 fluorescent dye attaches to something in ELs rather than that in SMLs.

405         The proposed method can measure the diffusion coefficient  $k$  of the fluorescent dye  
406 in the aortic walls (Fig. 6b). Notably, even though both flow and diffusion conveyed the  
407 fluorescent dye from the lumen to the adventitial side, the flow, and not the diffusion, mainly  
408 conveyed fluorescent dyes because the Peclet number was much larger than 1 (see  
409 Supplementary Materials S5). Although the movement of the fluorescent dye by diffusion was  
410 much smaller than that by flow, the measured diffusion coefficient  $k$  seemed appropriate  
411 because the diffusion coefficient  $k$  under the condition without a flow showed a similar value  
412 to that under the condition with a flow (see Supplementary Materials S6). Interestingly, the  
413 diffusion coefficient increased with an increase in the intraluminal pressure. Tedgui and Lever  
414 (1987) reported that the porosity of the liquid to fill the media at 70 mmHg was lower than that  
415 at 180 mmHg. This indicates that voids in the media increased with increasing intraluminal  
416 pressure, resulting in a higher diffusion coefficient as obtained in this study.

417

## 418 **Conclusion**

419         We proposed a novel method for directly observing the flow of a fluorescent dye and  
420 for quantifying the local interstitial flow velocity in the aortic wall. As a result, a higher  
421 interstitial flow in the radial direction was confirmed under the higher intraluminal  
422 pressurization of the aorta. Moreover, the interstitial flow was faster at the more intimal side  
423 of the aorta.

424

## 425 **Acknowledgements**

426         This work was supported in part by AMED Grant Number JP20gm0810005, JSPS  
427 KAKENHI Grant Number 21H04955a, and Tatematsu Foundation. We would like to thank  
428 Editage ([www.editage.com](http://www.editage.com)) for English language editing.

429

## 430 **Competing interests**

431         Not applicable.

432

433 **References**

- 434 Baldwin, A. L., & Wilson, L. M. (1993). Endothelium increases medial hydraulic  
435 conductance of aorta, possibly by release of EDRF. *Am J Physiol*, 264(1 Pt 2), H26-  
436 32. doi:10.1152/ajpheart.1993.264.1.H26
- 437 Baldwin, A. L., Wilson, L. M., Gradus-Pizlo, I., Wilensky, R., & March, K. (1997). Effect of  
438 atherosclerosis on transmural convection and arterial ultrastructure. *Arteriosclerosis,*  
439 *Thrombosis, and Vascular Biology*, 17(12), 3365-3375.  
440 doi:10.1161/01.ATV.17.12.3365
- 441 Baldwin, A. L., Wilson, L. M., & Simon, B. R. (1992). Effect of pressure on aortic hydraulic  
442 conductance. *Arteriosclerosis and Thrombosis: A Journal of Vascular Biology*, 12(2),  
443 163-171. doi:10.1161/01.ATV.12.2.163
- 444 Baldwin, A. L., Winlove, C. P., & Caro, C. G. (1982). Structural response of the rabbit  
445 thoracic aorta and inferior vena cava to in situ collapse. *Artery*, 10(6), 420-439.
- 446 Bevan, R. D. (1976). An autoradiographic and pathological study of cellular proliferation in  
447 rabbit arteries correlated with an increase in arterial pressure. *Journal of Vascular*  
448 *Research*, 13(1-2), 100-128. doi:10.1159/000158083
- 449 Chamley-Campbell, J. H., Campbell, G. R., & Ross, R. (1981). Phenotype-dependent  
450 response of cultured aortic smooth muscle to serum mitogens. *J Cell Biol*, 89(2), 379-  
451 383. doi:10.1083/jcb.89.2.379
- 452 Chooi, K. Y., Comerford, A., Sherwin, S. J., & Weinberg, P. D. (2016). Intimal and medial  
453 contributions to the hydraulic resistance of the arterial wall at different pressures: a  
454 combined computational and experimental study. *Journal of The Royal Society*  
455 *Interface*, 13(119), 20160234. doi:10.1098/rsif.2016.0234
- 456 Concannon, J., Dockery, P., Black, A., Sultan, S., Hynes, N., McHugh, P. E., . . . McGarry, J.  
457 P. (2020). Quantification of the regional bioarchitecture in the human aorta. *Journal of*  
458 *Anatomy*, 236(1), 142-155. doi:<https://doi.org/10.1111/joa.13076>
- 459 Dabagh, M., Jalali, P., Konttinen, Y. T., & Sarkomaa, P. (2008). Distribution of shear stress  
460 over smooth muscle cells in deformable arterial wall. *Med Biol Eng Comput*, 46(7),

- 461 649-657. doi:10.1007/s11517-008-0338-7
- 462 Deng, X., Marois, Y., & Guidoin, R. (1998). Fluid filtration across the arterial wall under  
463 flow conditions: is wall shear rate another factor affecting filtration rate? *Ann N Y*  
464 *Acad Sci*, 858, 105-115. doi:10.1111/j.1749-6632.1998.tb10145.x
- 465 Gaballa, M. A., Raya, T. E., Simon, B. R., & Goldman, S. (1992). Arterial mechanics in  
466 spontaneously hypertensive rats. Mechanical properties, hydraulic conductivity, and  
467 two-phase (solid/fluid) finite element models. *Circ Res*, 71(1), 145-158.  
468 doi:10.1161/01.res.71.1.145
- 469 Huang, Y., Rumschitzki, D., Chien, S., & Weinbaum, S. (1994). A fiber matrix model for the  
470 growth of macromolecular leakage spots in the arterial intima. *Journal of*  
471 *Biomechanical Engineering*, 116(4), 430-445. doi:10.1115/1.2895794
- 472 Kim, S. A., Sung, J. Y., Woo, C. H., & Choi, H. C. (2017). Laminar shear stress suppresses  
473 vascular smooth muscle cell proliferation through nitric oxide-AMPK pathway.  
474 *Biochem Biophys Res Commun*, 490(4), 1369-1374. doi:10.1016/j.bbrc.2017.07.033
- 475 Lever, M., Tarbell, J., & Caro, C. (1992). The effect of luminal flow in rabbit carotid artery  
476 on transmural fluid transport. *Experimental Physiology*, 77(4), 553-563.  
477 doi:10.1113/expphysiol.1992.sp003619
- 478 Liu, X., Huang, X., Chen, L., Zhang, Y., Li, M., Wang, L., . . . Zhang, M. (2015). Mechanical  
479 stretch promotes matrix metalloproteinase-2 and prolyl-4-hydroxylase  $\alpha 1$  production  
480 in human aortic smooth muscle cells via Akt-p38 MAPK-JNK signaling. *Int J*  
481 *Biochem Cell Biol*, 62, 15-23. doi:10.1016/j.biocel.2015.02.009
- 482 Lu, X., Huxley, V. H., & Kassab, G. S. (2013). Endothelial barrier dysfunction in diabetic  
483 conduit arteries: a novel method to quantify filtration. *American Journal of*  
484 *Physiology-Heart and Circulatory Physiology*, 304(3), H398-H405.  
485 doi:10.1152/ajpheart.00550.2012
- 486 Matsumoto, T., & Hayashi, K. (1996). Stress and strain distribution in hypertensive and  
487 normotensive rat aorta considering residual strain. *Journal of Biomechanical*  
488 *Engineering*, 118(1), 62-73. doi:10.1115/1.2795947
- 489 Nguyen, T., Toussaint, J., Xue, Y., Raval, C., Cancel, L., Russell, S., . . . Rumschitzki, D. S.

- 490 (2015). Aquaporin-1 facilitates pressure-driven water flow across the aortic  
491 endothelium. *Am J Physiol Heart Circ Physiol*, 308(9), H1051-1064.  
492 doi:10.1152/ajpheart.00499.2014
- 493 Ralevic, V., Kristek, F., Hudlická, O., & Burnstock, G. (1989). A new protocol for removal of  
494 the endothelium from the perfused rat hind-limb preparation. *Circulation Research*,  
495 64(6), 1190-1196. doi:10.1161/01.RES.64.6.1190
- 496 Reyna, S. V., Ensenat, D., Johnson, F. K., Wang, H., Schafer, A. I., & Durante, W. (2004).  
497 Cyclic strain stimulates L-proline transport in vascular smooth muscle cells. *Am J*  
498 *Hypertens*, 17(8), 712-717. doi:10.1016/j.amjhyper.2004.03.673
- 499 Shi, Z.-D., Abraham, G., & Tarbell, J. M. (2010). Shear stress modulation of smooth muscle  
500 cell marker genes in 2-D and 3-D depends on mechanotransduction by heparan sulfate  
501 proteoglycans and ERK1/2. *PLoS ONE*, 5(8), e12196.  
502 doi:10.1371/journal.pone.0012196
- 503 Shou, Y., Jan, K. M., & Rumschitzki, D. S. (2006). Transport in rat vessel walls. I. Hydraulic  
504 conductivities of the aorta, pulmonary artery, and inferior vena cava with intact and  
505 denuded endothelia. *Am J Physiol Heart Circ Physiol*, 291(6), H2758-2771.  
506 doi:10.1152/ajpheart.00610.2005
- 507 Sjölund, M., Madsen, K., von der Mark, K., & Thyberg, J. (1986). Phenotype modulation in  
508 primary cultures of smooth-muscle cells from rat aorta: Synthesis of collagen and  
509 elastin. *Differentiation*, 32(2), 173-180. doi:10.1111/j.1432-0436.1986.tb00570.x
- 510 Stanley, A. G., Patel, H., Knight, A. L., & Williams, B. (2000). Mechanical strain-induced  
511 human vascular matrix synthesis: the role of angiotensin II. *J Renin Angiotensin*  
512 *Aldosterone Syst*, 1(1), 32-35. doi:10.3317/jraas.2000.007
- 513 Sterpetti, A. V., Cucina, A., Fragale, A., Lepidi, S., Cavallaro, A., & Santoro-D'Angelo, L.  
514 (1994). Shear stress influences the release of platelet derived growth factor and basic  
515 fibroblast growth factor by arterial smooth muscle cells. Winner of the ESVS prize for  
516 best experimental paper 1993. *Eur J Vasc Surg*, 8(2), 138-142. doi:10.1016/s0950-  
517 821x(05)80448-7
- 518 Sugita, S., Kato, M., Wataru, F., & Nakamura, M. (2020). Three-dimensional analysis of the



- 519 thoracic aorta microscopic deformation during intraluminal pressurization.  
520 *Biomechanics and Modeling in Mechanobiology*, 19(1), 147-157.  
521 doi:10.1007/s10237-019-01201-w
- 522 Sugita, S., & Matsumoto, T. (2013). Quantitative measurement of the distribution and  
523 alignment of collagen fibers in unfixed aortic tissues. *Journal of Biomechanics*, 46(7),  
524 1403-1407. doi:10.1016/j.jbiomech.2013.02.003
- 525 Sugita, S., & Matsumoto, T. (2017). Multiphoton microscopy observations of 3D elastin and  
526 collagen fiber microstructure changes during pressurization in aortic media.  
527 *Biomechanics and Modeling in Mechanobiology*, 16(3), 763-773.  
528 doi:10.1007/s10237-016-0851-9
- 529 Tada, S., & Tarbell, J. M. (2000). Interstitial flow through the internal elastic lamina affects  
530 shear stress on arterial smooth muscle cells. *American Journal of Physiology-Heart  
531 and Circulatory Physiology*, 278(5), H1589-H1597.  
532 doi:10.1152/ajpheart.2000.278.5.H1589
- 533 Tada, S., & Tarbell, J. M. (2002). Flow through internal elastic lamina affects shear stress on  
534 smooth muscle cells (3D simulations). *Am J Physiol Heart Circ Physiol*, 282(2),  
535 H576-584. doi:10.1152/ajpheart.00751.2001
- 536 Tarbell, J. M., Lever, M. J., & Caro, C. G. (1988). The effect of varying albumin  
537 concentration of the hydraulic conductivity of the rabbit common carotid artery.  
538 *Microvascular Research*, 35(2), 204-220. doi:10.1016/0026-2862(88)90063-5
- 539 Tedgui, A., & Lever, M. J. (1984). Filtration through damaged and undamaged rabbit thoracic  
540 aorta. *Am J Physiol*, 247(5 Pt 2), H784-791. doi:10.1152/ajpheart.1984.247.5.H784
- 541 Tedgui, A., & Lever, M. J. (1987). Effect of pressure and intimal damage on 131I-albumin  
542 and [14C]sucrose spaces in aorta. *American Journal of Physiology-Heart and  
543 Circulatory Physiology*, 253(6), H1530-H1539.  
544 doi:10.1152/ajpheart.1987.253.6.H1530
- 545 Toussaint, J., Raval, C. B., Nguyen, T., Fadaifard, H., Joshi, S., Wolberg, G., . . .  
546 Rumschitzki, D. S. (2017). Chronic hypertension increases aortic endothelial  
547 hydraulic conductivity by upregulating endothelial aquaporin-1 expression. *American*

- 548 *Journal of Physiology-Heart and Circulatory Physiology*, 313(5), H1063-H1073.  
549 doi:10.1152/ajpheart.00651.2016
- 550 Vargas, C. B., Vargas, F. F., Pribyl, J. G., & Blackshear, P. L. (1979). Hydraulic conductivity  
551 of the endothelial and outer layers of the rabbit aorta. *American Journal of*  
552 *Physiology-Heart and Circulatory Physiology*, 236(1), H53-H60.  
553 doi:10.1152/ajpheart.1979.236.1.H53
- 554 Wada, K. (2010). Detection of multivariate outliers -modified stahel-dnoho estimators-.  
555 *Research memoir of the statistics*, 67, 89-157.
- 556 Wang, S., & Tarbell, J. M. (2000). Effect of fluid flow on smooth muscle cells in a 3-  
557 dimensional collagen gel model. *Arterioscler Thromb Vasc Biol*, 20(10), 2220-2225.  
558 doi:10.1161/01.atv.20.10.2220
- 559 Wang, Z., Liu, M., Liu, X., Sun, A., Fan, Y., & Deng, X. (2019). Hydraulic conductivity and  
560 low-density lipoprotein transport of the venous graft wall in an arterial bypass.  
561 *Biomedical Engineering OnLine*, 18(1), 50. doi:10.1186/s12938-019-0669-7

## Supplementary Materials

### **S1. Can the fluorescent intensity be used as an index of the concentration of fluorescent dye?**

This study experimentally investigated whether the fluorescent intensity could be used as an index of the concentration of the fluorescent dye.

We prepared a fluorescent dye solution (CI-45350, Tokyo Chemical Industry, Tokyo, Japan) with a concentration of 1.06 mM, corresponding to the solution used in this study, as well as lower concentrations of 0.53, 0.33, 0.27, 0.21, 0.18, 0.15, and 0.13 mM. Figure S1.1 shows a schematic of the experimental setup. First, 50  $\mu\text{L}$  of the solution was dropped into a large Petri dish (MS-11600, Sumitomo Bakelite, Tokyo, Japan), and then, a smaller Petri dish (MS-11350, Sumitomo Bakelite, Tokyo, Japan) was placed on the solution. These dishes were placed on the stage of a two-photon microscope (FV1200MPE, Olympus, Tokyo, Japan), and the fluorescent dye was observed using the G-channel bandpass filter (495–540 nm). An image stack with a size of  $512 \times 512$  pixels ( $212 \times 212 \mu\text{m}$ ) in the  $x$ - $y$  plane and  $30 \mu\text{m}$  with every  $5 \mu\text{m}$  in the  $z$ -direction (optical direction) was captured. The captured image was resliced from the  $y$ -direction, and a 2D  $x$ - $z$  projection image was obtained as the maximum intensity. Then, the image in the  $x$ -direction was averaged, and the maximum value in the  $z$ -direction was defined as the intensity of the fluorescent solution.

Figure S1.2 shows the relationship between the fluorescent intensity and the concentration. The intensity is significantly and highly correlated with the concentration ( $R = 0.999$ ,  $p < 0.01$ ). This result indicates that the concentration can be evaluated from the intensity of the fluorescent image.

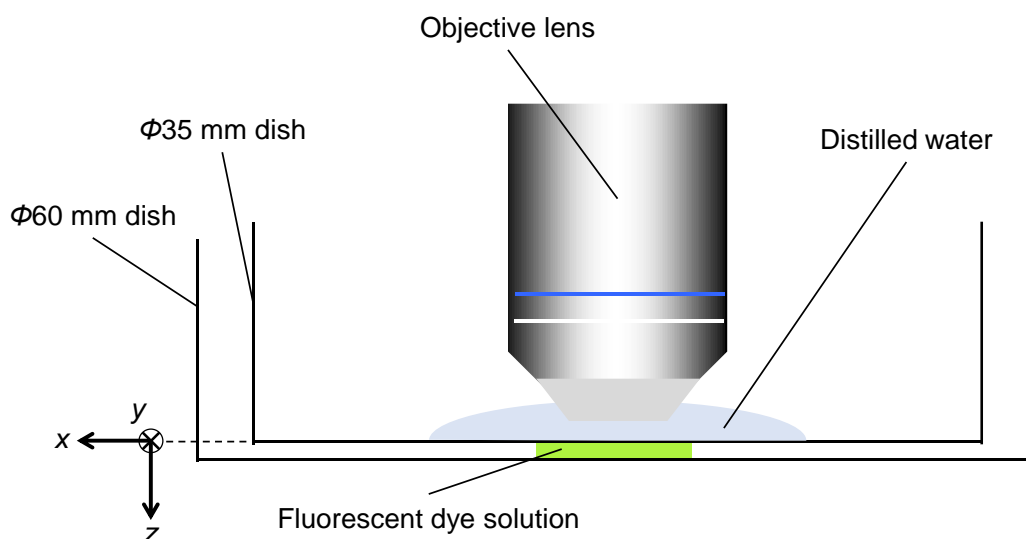

**Fig. S1.1** A schematic illustration of intensity measurement of fluorescent dye.

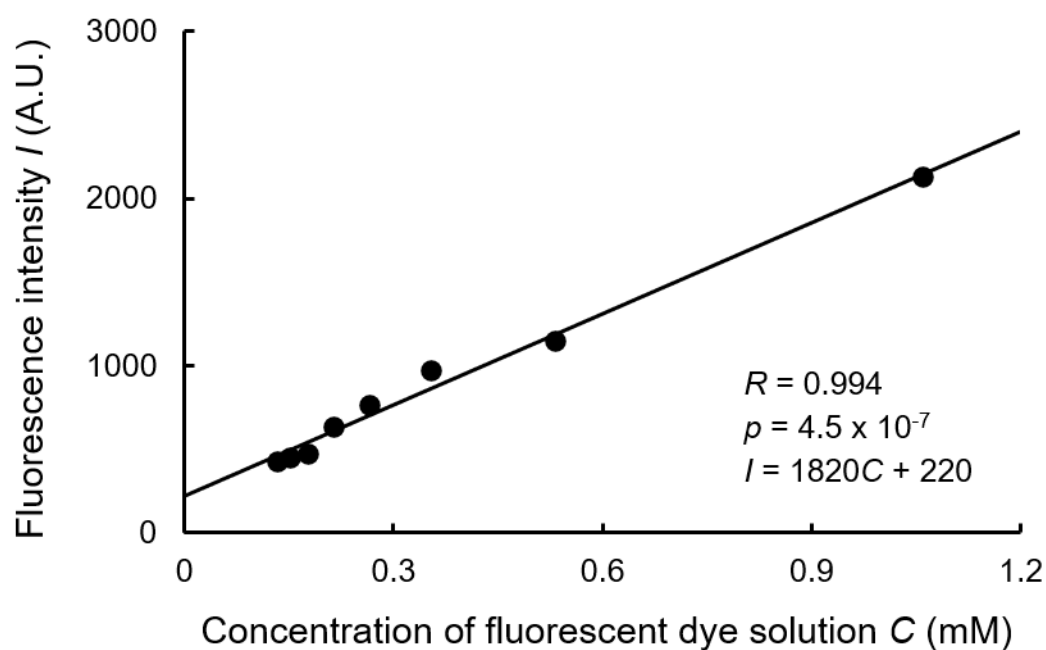

**Fig. S1.2** Fluorescent intensity  $I$  plotted against the fluorescent dye concentration  $C$ .  $R$ , correlation coefficient.

## **S2. Result of kymograph, plots between $a'$ and $b'$ , and determined velocity $v$ in ELs and SMLs**

The kymograph, plots between  $a'$  and  $b'$ , and determined velocity  $v$  in each EL and SML as obtained for the interstitial flow velocity in the whole thickness of the aorta are shown in Figs. S2.1, S2.2, and S2.3, respectively. Because the time length of the kymographs was determined as the time at which the intensity almost reached the static state, the shorter kymograph means that the concentration has early reached the steady state and that the velocity (i.e., diffusion) is high there (Fig. S2.1). The plots between  $a'$  and  $b'$  show a good and high correlation (Fig. S2.2). In Fig. S2.3, negative values are often observed in ELs and even in SMLs (0–3 from 10–13 measurements). These results indicate the low accuracy of this measurement in ELs, and therefore, the EL data was not used in further analyses. The low accuracy in ELs was attributed to the nature of the fluorescent dye; specifically, the dye was bound more easily to the ELs than to SMLs (See Supplementary Materials S4). Under such conditions, the inverse intensity gradient, where the intensity on the adventitial side is higher than that on the intimal side in the  $r$ -direction, can be locally seen; it results in a negative slope in the plots between  $a'$  and  $b'$ .

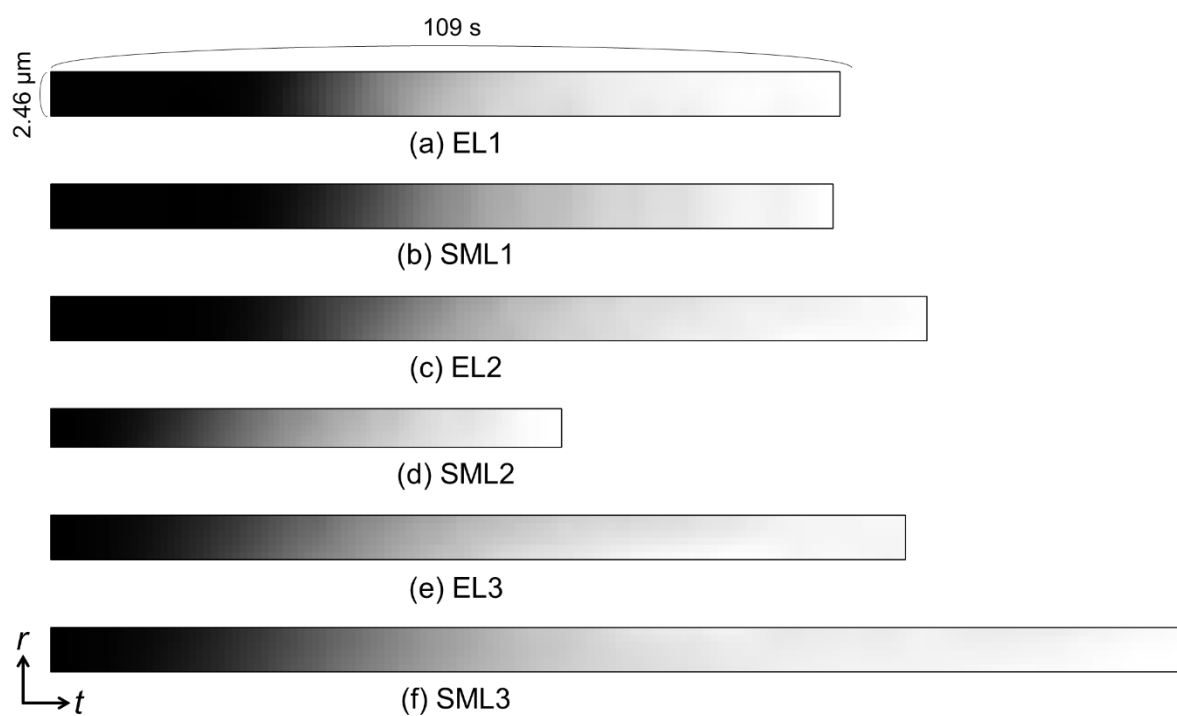

**Fig. S2.1** Kymograph of fluorescent dye solution in (a) EL1, (b) SML1, (c) EL2, (d) SML2, (e) EL3, and (f) SML3 from the intraluminal side at intraluminal pressure of 160 mmHg.  $t$ , time axis;  $r$ , radial axis.

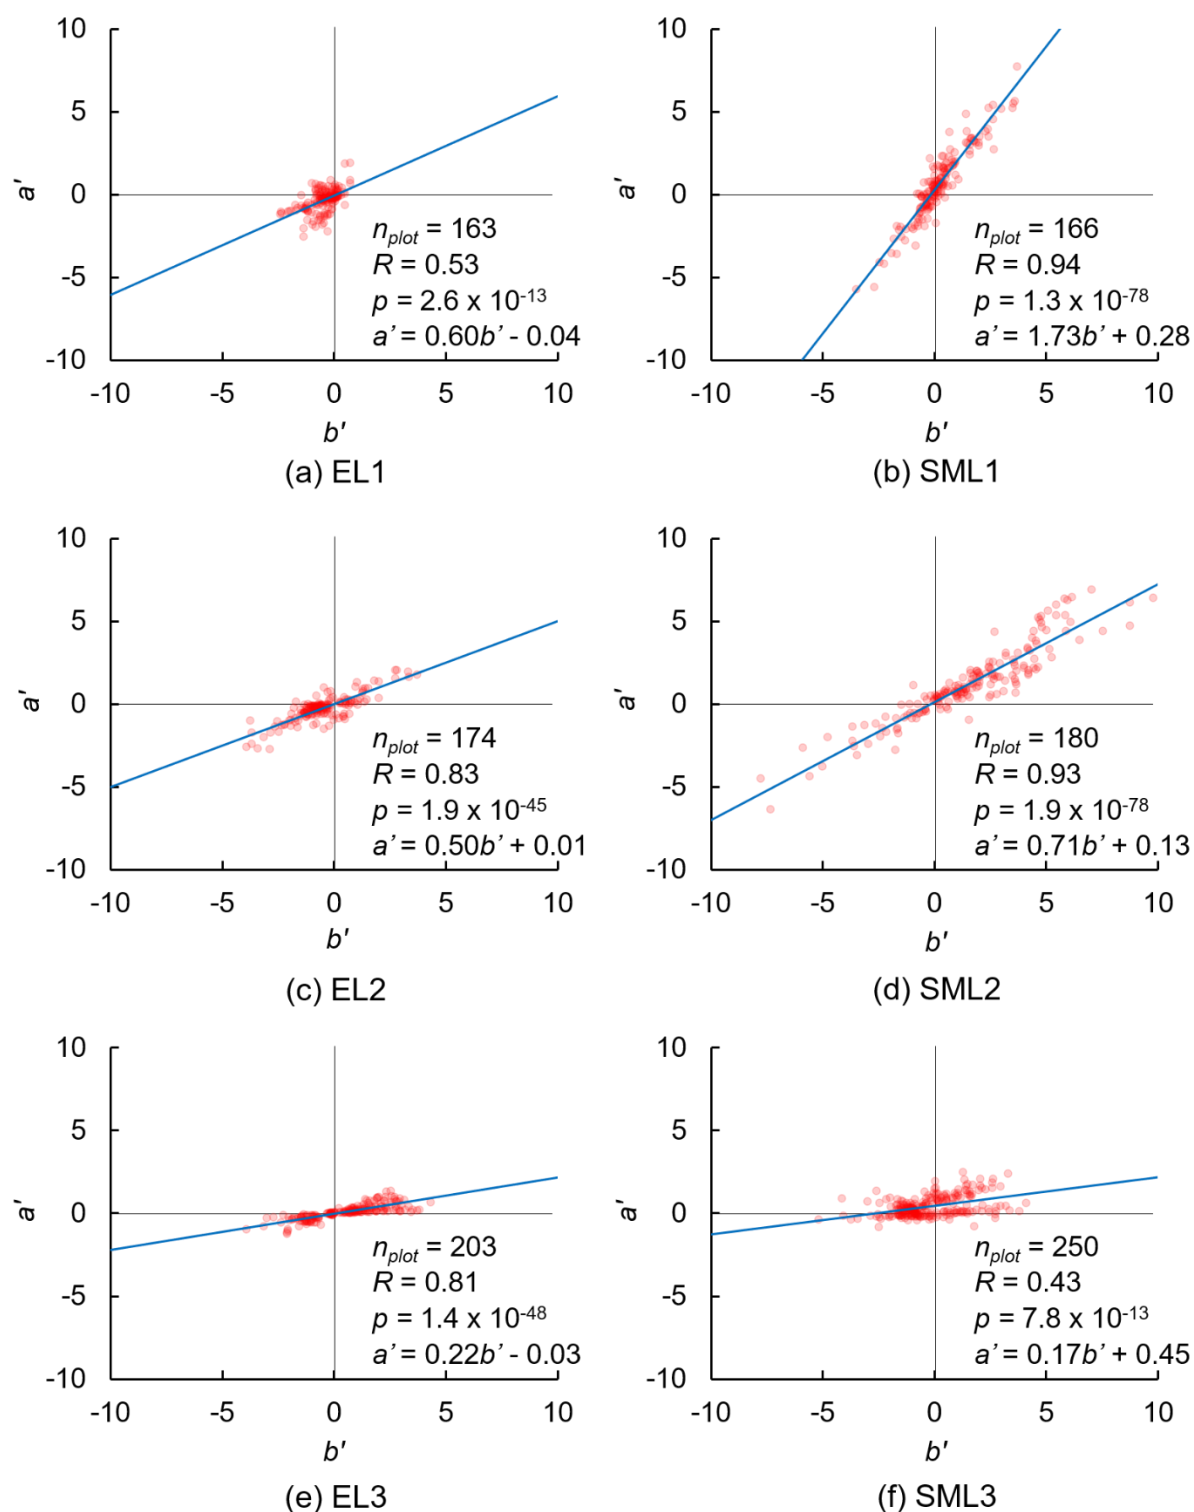

**Fig. S2.2** Typical plots of  $a'$  and  $b'$  in Eq. (8) in (a) EL1, (b) SML1, (c) EL2, (d) SML2, (e) EL3, and (f) SML3 from the intraluminal side at intraluminal pressure of 160 mmHg.  $n_{plot}$ , number of plots.

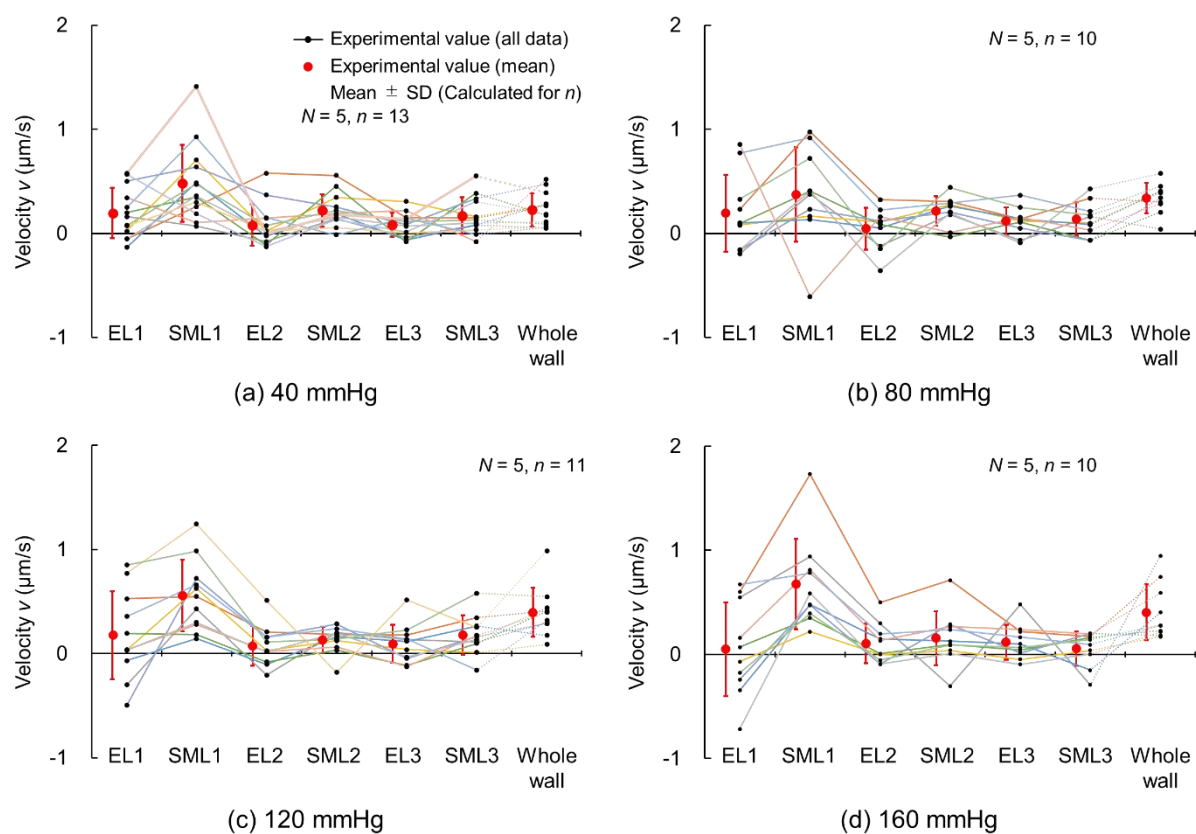

**Fig. S2.3** Interstitial flow velocity in local ELs and SMLs along with the velocity of the whole wall at (a) 40, (b) 80, (c) 120, and (d) 160 mmHg.  $N$ , Number of mice;  $n$ , number of data.



### S3. Changes in wall thickness during pressurization

Because the aorta is viscoelastic, the wall thickness might decrease during pressurization, resulting in an increased pressure gradient through the aortic walls and interstitial flow velocity. Here, we investigated the wall thickness at the start time  $t_{start}$  and end time  $t_{end}$  of the captured image.

The images in Fig. 3 were used for this analysis. The distance between the internal and the external ELs (*i.e.*,  $r_{EEL}$ ) was determined as the wall thickness  $W$ . The wall thickness was measured at  $t_{start}$  and  $t_{end}$ , and they were compared and tested with a paired Student's  $t$ -test for all pressure levels  $P$ . The correlation coefficient between  $W$  and  $P$  was tested using Student's  $t$ -test. The significant level was set as  $p = 0.05$ .

Figure S3.1 shows the wall thickness  $W$  at the start time  $t_{start}$  and end time  $t_{end}$ .  $W$  at  $t_{start}$  was comparable to  $W$  at  $t_{end}$  for all pressure levels, and there were no significant differences between them, indicating that the wall thickness did not change during the experiment. The wall thickness significantly and negatively correlated with the intraluminal pressure ( $R = -0.507$  for  $t_{start}$ ,  $p < 0.05$ ;  $R = -0.505$  for  $t_{end}$ ,  $p < 0.05$ ) as reported in Guo et al. (Guo et al., 2007). Thus, the pressure gradient in the radial direction increased with an increase in the pressure owing to not only the pressure itself but also the reduction in the wall thickness.

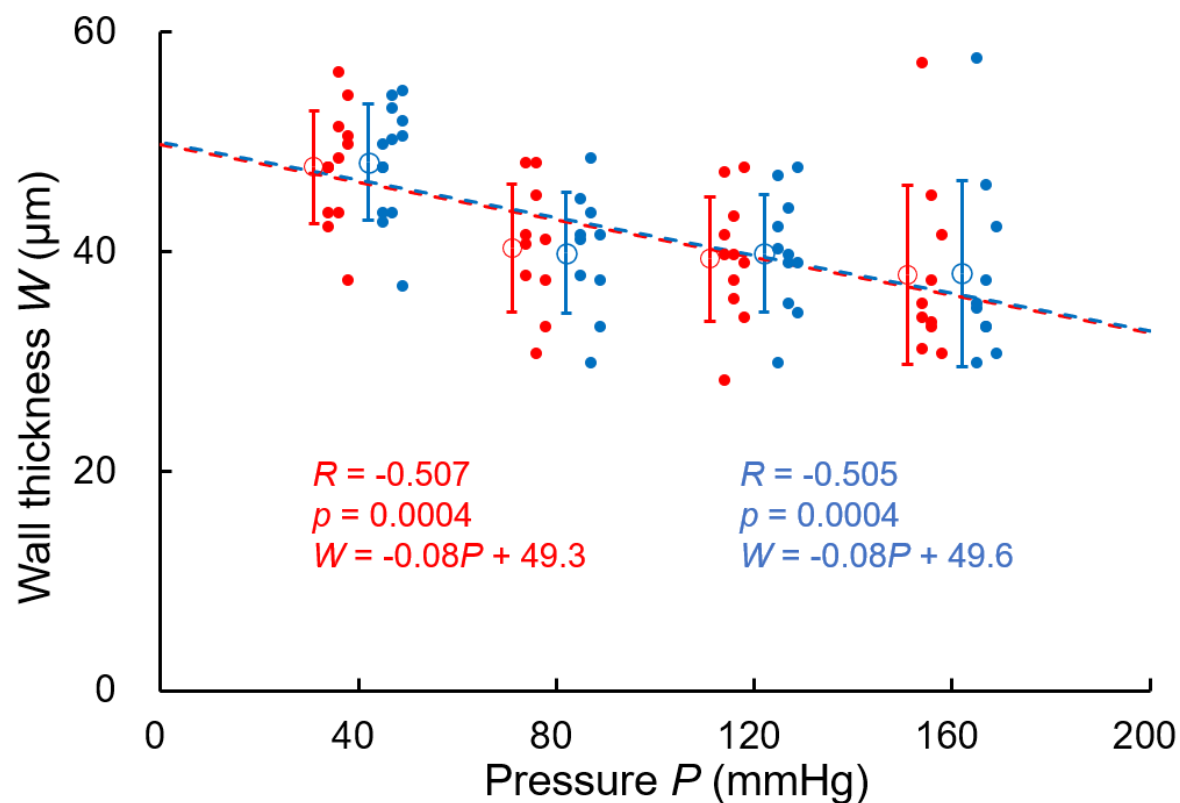

**Fig. S3.1** Aortic wall thickness  $W$  plotted to intraluminal pressure  $P$  at the start time  $t_{\text{start}}$  (red) and end time  $t_{\text{end}}$  (blue). Number of mice  $N = 5$ ; number of measurement data  $n = 13$  at 40 mmHg,  $n = 10$  at 80 mmHg,  $n = 11$  at 120, and  $n = 10$  at 160 mmHg;  $R$ , correlation coefficient.

#### **S4. Why was the intensity in the EL region higher than that in the SML region?**

The fluorescent intensity of the fluorescent dye solution was higher in ELs than in SMLs. This fluorescent intensity in ELs was not generated from the autofluorescence of elastin because the intensity was not high at time  $t = t_{\text{start}}$  (images in top row in Fig. 4). Thus, we hypothesized that the fluorescent dye, uranine, is more bound to ELs than to SMLs, and we evaluated this hypothesis.

Aortic samples were sliced with a microslicer as described in a previous report (Sugita et al., 2021). The samples were immersed in 1.06 mM uranine fluorescent dye solution for 5 min at room temperature and then washed with the buffer. A sample image was observed under the two-photon microscope. A  $512 \times 512$  pixel ( $212 \mu\text{m} \times 212 \mu\text{m}$ ) image stack (2.00- $\mu\text{m}$  intervals between image sectioning and total thickness of 40–80  $\mu\text{m}$ ) was captured. After taking the maximum intensity projection, the intensities in both regions were measured by tracing the regions of ELs and SMLs using ImageJ image analysis software.

Figure S4.1 shows the fluorescent images before and after immersing the specimen in the fluorescent dye solution. The intensity after immersion is clearly higher in the ELs than in SMLs. Figure S4.2 shows the quantified intensity in ELs and SMLs after immersion in the fluorescent dye solution. In this graph, the intensity is normalized with the intensity before immersion in the fluorescent dye solution to remove the effect of autofluorescence. The fluorescent intensity in ELs is significantly higher than that in SMLs. Thus, we conclude that the uranine fluorescent dye binds more to ELs than to SMLs.

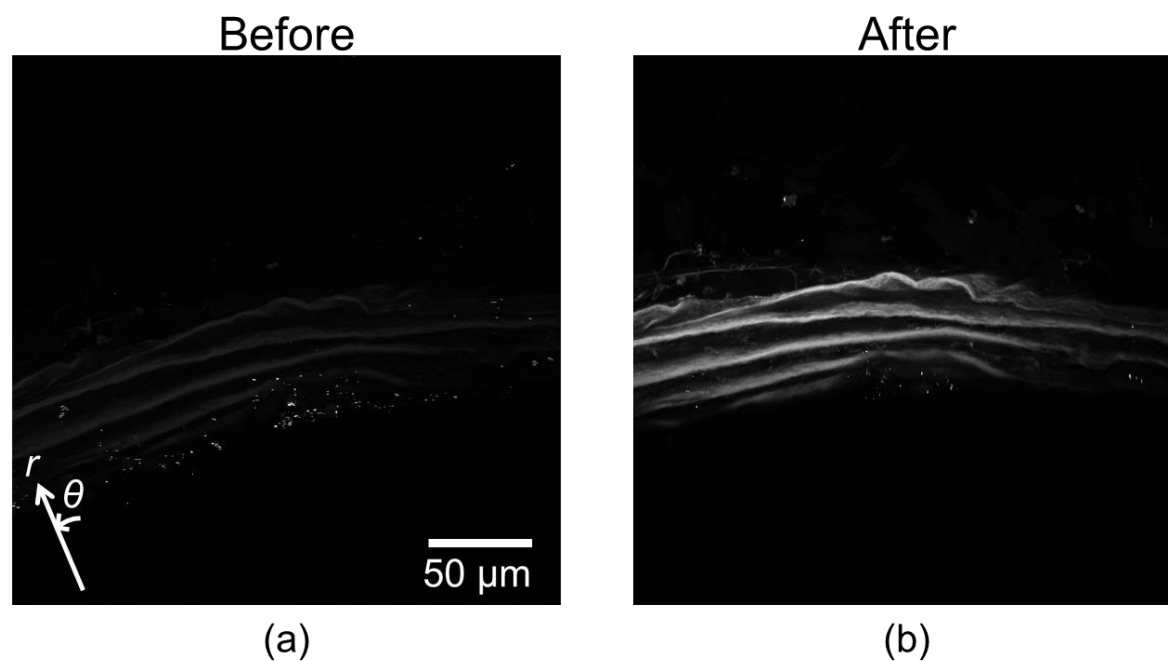

**Fig. S4.1** Fluorescent images of the aorta (a) before and (b) after immersion in the fluorescent dye solution. In (b), the fluorescent intensity in ELs is much higher than that in SMLs.

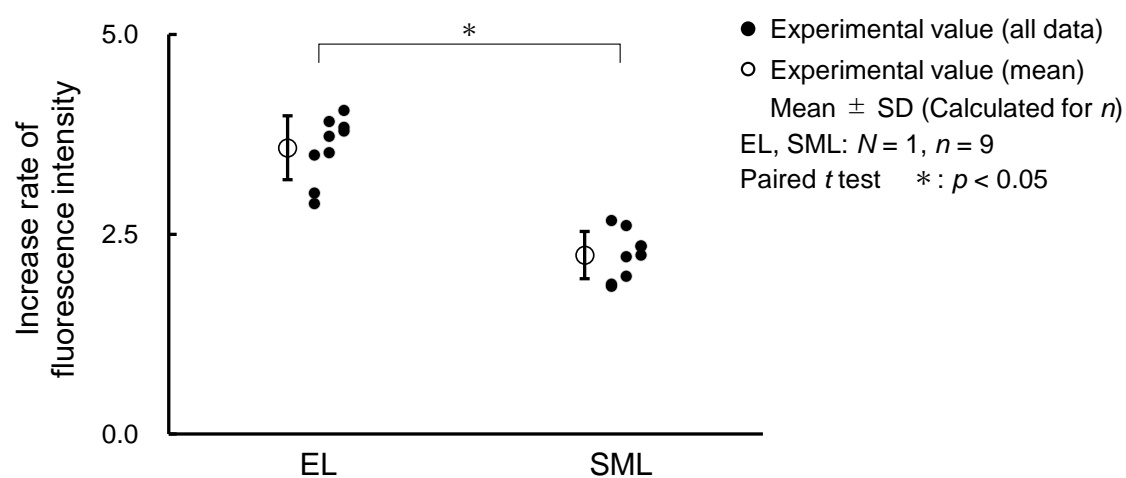

**Fig. S4.2** The ratio of the fluorescent intensity before immersion to that after immersion in the fluorescent dye solution in ELs and SMLs.  $N$ , Number of mice;  $n$ , number of data.

## S5. Comparison of convective velocity with diffusive velocity

Because the fluorescent dye moves by both the interstitial flow and diffusion, we compared the magnitudes of both effects. To evaluate the magnitudes of the velocity and diffusion, the Peclet number  $Pe$ , which shows the ratio of convective velocity to diffusive velocity, was calculated according to Baldwin et al. (Baldwin et al., 1997) as follows:

$$Pe = \frac{v}{P_m} (1 - \sigma_f), \quad (S5.1)$$

where  $P_m$  is the permeability coefficient and  $\sigma_f$ , the filtration reflection coefficient.  $Pe > 1$  indicates that the convective velocity dominates over the diffusive velocity. The diffusion coefficient  $k$  is obtained as the division of  $P_m$  and the wall thickness  $W$ :

$$Pe = \frac{vW}{k} (1 - \sigma_f). \quad (S5.2)$$

Shou et al. (Shou et al., 2006) estimated  $\sigma_f$  of trypan blue (molecular weight: 961) as 0.064. Because the molecular weight of uranine is 376,  $\sigma_f$  of uranine must be  $<0.064$ . The averaged  $v$  and  $k$  values obtained in this study are  $0.33 \mu\text{m/s}$  and  $0.38 \mu\text{m}^2/\text{s}$  (40–160 mmHg), respectively, and the averaged thickness is  $W = 41.8 \mu\text{m}$ . By using  $\sigma_f = 0.064$ ,  $Pe$  is calculated as 34. Because  $\sigma_f$  of uranine must be  $<0.064$ , the Peclet number is  $>34$ . This indicates that the diffusion velocity in the aorta is much smaller than the convective velocity.

## S6. Measurement of diffusion coefficient without flow

The proposed method can measure the diffusion coefficient as well as the flow velocity. Because the movement of the fluorescent dye by diffusion was much smaller than that by flow (see Supplementary Materials S5), we did not have confidence in the accuracy of the measured diffusion coefficient. Thus, to verify the magnitude of the diffusion coefficient, we measured the diffusion coefficient under the condition without flow.

We tried to measure only the diffusion coefficient. However, under zero intraluminal pressurization, the shape of the aorta cannot be maintained as a cylindrical pipe, resulting in a difficulty in observing the fluorescent dye. Thus, we applied an intraluminal pressure of only 5 mmHg to maintain the shape of the aortic sample and a small interstitial flow in the aorta in the experiments described in this section.

The three-way valve (no. 3 in Fig. 1) was opened, and the intraluminal pressure was kept at 80 mmHg until the fluorescent dye solution reached the aortic sample. Then, the pressure applied by the electropneumatic regulator was temporarily stopped and a hydrostatic pressure of 5 mmHg was applied to the intraluminal side of the aorta by vertically elevating the reservoir. The fluorescent dye was observed and image analysis was performed.

Figure S6.1a shows a time-lapsed image of fluorescent in the aortic wall at 5 mmHg in the radial-circumferential ( $r$ - $\theta$ ) plane. The fluorescent intensity gradually increased with increasing time, indicating that the fluorescent dye moved into the aortic walls. After 200 s, the intensity in the adventitial side of the media became 0, indicating that this side was locally destroyed by laser ablation. Because the adventitial side of the media was destroyed, only the intimal side (region within 29  $\mu\text{m}$  from the internal EL) was analyzed. Further, only images captured until 200 s were used because the intensity in the intimal side suddenly increased. This might have been caused by the destruction of the adventitial side, and the laser easily reached the intimal side. The average intensity in the analyzed region until 200 s (Fig. S6b) and the normalized kymograph (Fig. S6c) clearly show the increase in the fluorescent intensity with increasing time. Figure S6d shows the plots of ( $a'$ ,  $b'$ ). The fitted linear regression line was  $a' = 0.01b' + 0.16$ , and no significant correlation was observed. This result confirms that the interstitial flow was negligibly small (0.01  $\mu\text{m/s}$ ) at 5 mmHg. The diffusion coefficient ( $k$

=  $0.16 \mu\text{m}^2/\text{s}$ ) almost concurred with the data at 40 mmHg ( $k = 0.24 \pm 0.18 \mu\text{m}^2/\text{s}$ ). Therefore, we confirmed that the diffusion coefficients in the aortic media as measured using the proposed method were appropriate even under higher intraluminal pressures.

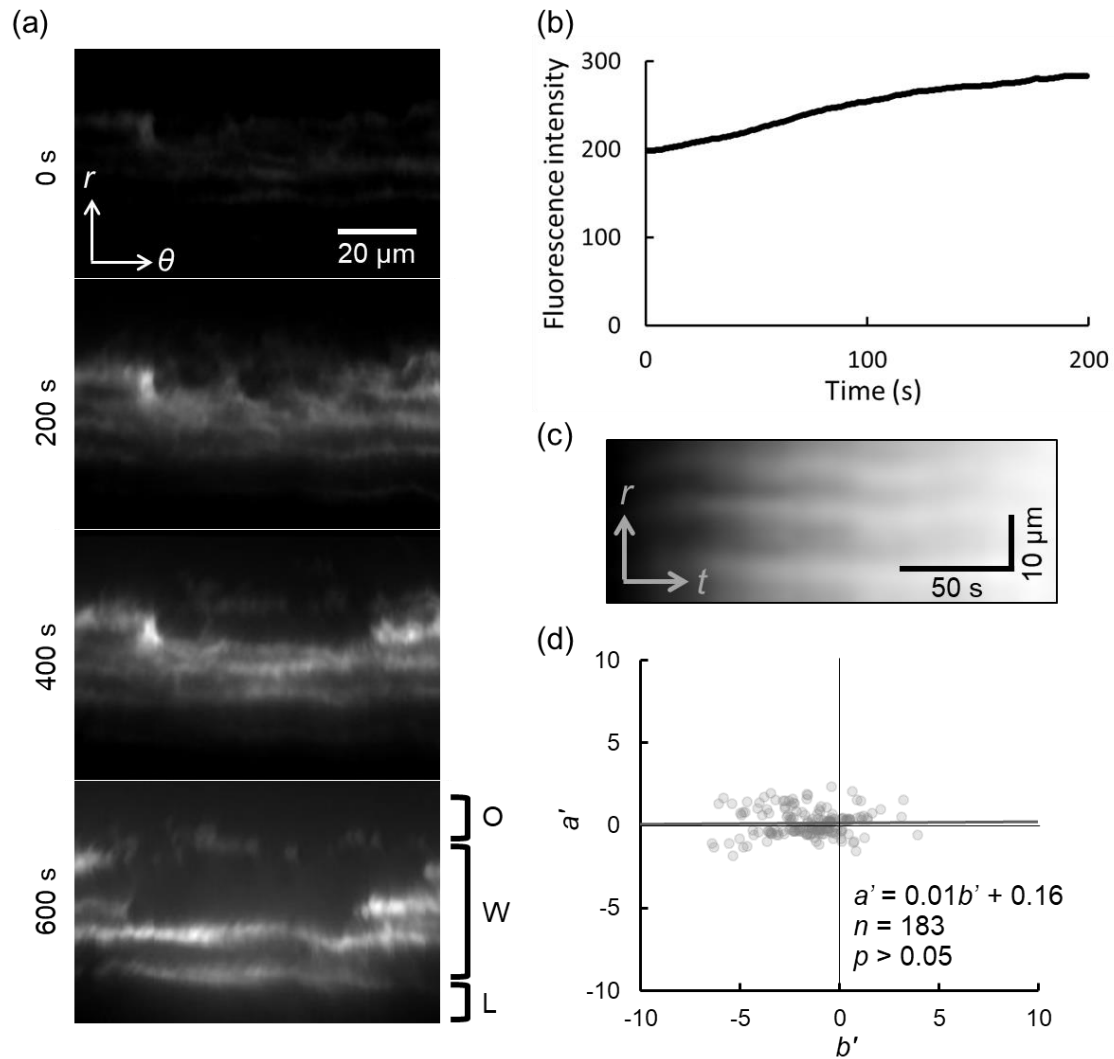

**Fig. S6.1** Images of interstitial flow in the aortic wall at intraluminal pressure of 5 mmHg, and image analysis processes of interstitial flow velocity and diffusion coefficient. (a) Time-lapsed images of the aortic walls in the radius-circumferential ( $r$ - $\theta$ ) cross-section at intraluminal pressure of 5 mmHg. Images were captured at 0, 200, 400, and 600 s after capturing a photograph. From the top to the bottom sides, the outside of the aorta (O), aortic wall (W), and lumen (L) are shown. (b) Time-course change in the average fluorescence intensity taken on the intimal side of the aortic wall. (c) A normalized kymograph with 0 at its left edge and 1 at its right edge. The normalization was performed at each  $r$ -axis.  $t$ , time axis. (d) Plots of  $a'$  and  $b'$  at intraluminal pressure of 5 mmHg.  $n$ , number of plots.



## References

- Baldwin, A. L., Wilson, L. M., Gradus-Pizlo, I., Wilensky, R., & March, K. (1997). Effect of atherosclerosis on transmural convection and arterial ultrastructure. *Arteriosclerosis, Thrombosis, and Vascular Biology*, 17(12), 3365-3375. doi:10.1161/01.ATV.17.12.3365
- Guo, X., Lanir, Y., & Kassab, G. S. (2007). Effect of osmolarity on the zero-stress state and mechanical properties of aorta. *American Journal of Physiology-Heart and Circulatory Physiology*, 293(4), H2328-H2334. doi:10.1152/ajpheart.00402.2007
- Shou, Y., Jan, K. M., & Rumschitzki, D. S. (2006). Transport in rat vessel walls. I. Hydraulic conductivities of the aorta, pulmonary artery, and inferior vena cava with intact and denuded endothelia. *Am J Physiol Heart Circ Physiol*, 291(6), H2758-2771. doi:10.1152/ajpheart.00610.2005
- Sugita, S., Mizuno, N., Ujihara, Y., & Nakamura, M. (2021). Stress fibers of the aortic smooth muscle cells in tissues do not align with the principal strain direction during intraluminal pressurization. *Biomechanics and Modeling in Mechanobiology*. doi:10.1007/s10237-021-01427-7

**Movie 1** Time-lapsed images of ELs (red) and fluorescent dye (green) solutions in the  $r$ - $\theta$  plane at 40, 80, 120, and 160 mmHg.
